# Supplementary material
Source: publisher figshare collection journal article supplement (https://acs.figshare.com/ndownloader/files/14553713)
Supplement: Supplementary file 1 [file 14553713]

## Sheet: Parameter
[omics-excel]
Open Search
Database
Title	Location
uniprot_homo_reviewed_20180511_MSFragger.fasta	Z:\MaoJiawei\fasta\uniprot_homo_reviewed_20180511_MSFragger.fasta
Enzymes
Title	Cleavage	Missed Cleavages	Semi Specific
Trypsin	[KR]|[^P]	4	FALSE
MS Files
Title	Name	Location	Type
20170803_Serum_Native_Prefraction_Run1_F1	20170803_Serum_Native_Prefraction_Run1_F1.mzXML	20170803_Serum_Native_Prefraction_Run1_F1.mzXML	MZXML
20170803_Serum_Native_Prefraction_Run1_F10	20170803_Serum_Native_Prefraction_Run1_F10.mzXML	20170803_Serum_Native_Prefraction_Run1_F10.mzXML	MZXML
20170803_Serum_Native_Prefraction_Run1_F2	20170803_Serum_Native_Prefraction_Run1_F2.mzXML	20170803_Serum_Native_Prefraction_Run1_F2.mzXML	MZXML
20170803_Serum_Native_Prefraction_Run1_F3	20170803_Serum_Native_Prefraction_Run1_F3.mzXML	20170803_Serum_Native_Prefraction_Run1_F3.mzXML	MZXML
20170803_Serum_Native_Prefraction_Run1_F4	20170803_Serum_Native_Prefraction_Run1_F4.mzXML	20170803_Serum_Native_Prefraction_Run1_F4.mzXML	MZXML
20170803_Serum_Native_Prefraction_Run1_F5	20170803_Serum_Native_Prefraction_Run1_F5.mzXML	20170803_Serum_Native_Prefraction_Run1_F5.mzXML	MZXML
20170803_Serum_Native_Prefraction_Run1_F6	20170803_Serum_Native_Prefraction_Run1_F6.mzXML	20170803_Serum_Native_Prefraction_Run1_F6.mzXML	MZXML
20170803_Serum_Native_Prefraction_Run1_F7	20170803_Serum_Native_Prefraction_Run1_F7.mzXML	20170803_Serum_Native_Prefraction_Run1_F7.mzXML	MZXML
20170803_Serum_Native_Prefraction_Run1_F8	20170803_Serum_Native_Prefraction_Run1_F8.mzXML	20170803_Serum_Native_Prefraction_Run1_F8.mzXML	MZXML
20170803_Serum_Native_Prefraction_Run1_F9	20170803_Serum_Native_Prefraction_Run1_F9.mzXML	20170803_Serum_Native_Prefraction_Run1_F9.mzXML	MZXML
Fixed Modifications
Title	Formula	Mass	Amino Acid	Position	Neutral Loss	Mass
160.0307		57.0215	C	Anywhere
Variable Modifications
Title	Formula	Mass	Amino Acid	Position	Neutral Loss	Mass
115.0269		0.9840	N	Anywhere
129.0426		0.9840	Q	Anywhere
147.0354		15.9949	M	Anywhere
Analysis Softwares
X!Tandem	MSFragger-20181110	MS:1001476
PIA		MS:1002387
Identification Parameters
Peptide Mass Tolerance	0	1000	Da	MONOISOTOPIC
Fragment Mass Tolerance	0.05	0.05	Da	MONOISOTOPIC
PSM-level q-value	0.0100	MS:1002354
X!Tandem:expect	1.0E-2	MS:1001330
Additional Parameters
PIA	OccamsRazor

## Sheet: PSM
MS File	Scan Number	Scan Index	MS Title	RT [sec]	Precursor Mass	Precursor Charge	Precursor m/z	Rank	Sequence	Length	Modifications	Modified Sequence	Peptide Mass	Mass Error [Da]	Mass Error [ppm]	# Missed Cleavages	Hit Type	Proteins	PSM-level q-value	X!Tandem:expect	X!Tandem:hyperscore	X!Tandem:nextscore	tot_num_ions
20170803_Serum_Native_Prefraction_Run1_F1	20949	14521	20170803_Serum_Native_Prefraction_Run1_F1.18077.18077.5	64.018	4907.1650	5	982.4403	1	HYTNPSQDVTVPCPVPSTPPTPSPSTPPTPSPSCCHPR	38	C34(160.0307);C35(160.0307);C13(160.0307)	HYTNPSQDVTVPC(160.0307)PVPSTPPTPSPSTPPTPSPSC(160.0307)C(160.0307)HPR	4135.8828	771.2822	186485.5068	0	TARGET	sp|P01876|IGHA1_HUMAN Immunoglobulin heavy constant alpha 1 OS=Homo sapiens OX=9606 GN=IGHA1 PE=1 SV=2	0.0000	1.786E-7	38.337	35.710	296
20170803_Serum_Native_Prefraction_Run1_F1	20992	14533	20170803_Serum_Native_Prefraction_Run1_F1.18092.18092.4	64.109	4907.1713	4	1227.8001	1	HYTNPSQDVTVPCPVPSTPPTPSPSTPPTPSPSCCHPR	38	C34(160.0307);C35(160.0307);C13(160.0307)	HYTNPSQDVTVPC(160.0307)PVPSTPPTPSPSTPPTPSPSC(160.0307)C(160.0307)HPR	4135.8828	771.2885	186487.0300	0	TARGET	sp|P01876|IGHA1_HUMAN Immunoglobulin heavy constant alpha 1 OS=Homo sapiens OX=9606 GN=IGHA1 PE=1 SV=2	0.0000	2.839E-5	33.842	33.566	222
20170803_Serum_Native_Prefraction_Run1_F1	21040	14549	20170803_Serum_Native_Prefraction_Run1_F1.18111.18111.4	64.210	4866.1494	4	1217.5446	1	HYTNPSQDVTVPCPVPSTPPTPSPSTPPTPSPSCCHPR	38	C34(160.0307);C35(160.0307);C13(160.0307)	HYTNPSQDVTVPC(160.0307)PVPSTPPTPSPSTPPTPSPSC(160.0307)C(160.0307)HPR	4135.8828	730.2666	176568.4946	0	TARGET	sp|P01876|IGHA1_HUMAN Immunoglobulin heavy constant alpha 1 OS=Homo sapiens OX=9606 GN=IGHA1 PE=1 SV=2	0.0000	3.299E-5	34.616	34.338	222
20170803_Serum_Native_Prefraction_Run1_F1	21104	14564	20170803_Serum_Native_Prefraction_Run1_F1.18130.18130.5	64.345	4866.1528	5	974.2378	1	HYTNPSQDVTVPCPVPSTPPTPSPSTPPTPSPSCCHPR	38	C34(160.0307);C35(160.0307);C13(160.0307)	HYTNPSQDVTVPC(160.0307)PVPSTPPTPSPSTPPTPSPSC(160.0307)C(160.0307)HPR	4135.8828	730.2700	176569.3167	0	TARGET	sp|P01876|IGHA1_HUMAN Immunoglobulin heavy constant alpha 1 OS=Homo sapiens OX=9606 GN=IGHA1 PE=1 SV=2	0.0000	4.355E-9	43.558	38.423	296
20170803_Serum_Native_Prefraction_Run1_F1	21122	14569	20170803_Serum_Native_Prefraction_Run1_F1.18136.18136.5	64.382	4907.1708	5	982.4414	1	HYTNPSQDVTVPCPVPSTPPTPSPSTPPTPSPSCCHPR	38	C34(160.0307);C35(160.0307);C13(160.0307)	HYTNPSQDVTVPC(160.0307)PVPSTPPTPSPSTPPTPSPSC(160.0307)C(160.0307)HPR	4135.8828	771.2880	186486.9092	0	TARGET	sp|P01876|IGHA1_HUMAN Immunoglobulin heavy constant alpha 1 OS=Homo sapiens OX=9606 GN=IGHA1 PE=1 SV=2	0.0000	6.721E-4	34.521	29.537	296
20170803_Serum_Native_Prefraction_Run1_F1	21169	14579	20170803_Serum_Native_Prefraction_Run1_F1.18149.18149.4	64.482	4907.1708	4	1227.8000	1	HYTNPSQDVTVPCPVPSTPPTPSPSTPPTPSPSCCHPR	38	C34(160.0307);C35(160.0307);C13(160.0307)	HYTNPSQDVTVPC(160.0307)PVPSTPPTPSPSTPPTPSPSC(160.0307)C(160.0307)HPR	4135.8828	771.2880	186486.9092	0	TARGET	sp|P01876|IGHA1_HUMAN Immunoglobulin heavy constant alpha 1 OS=Homo sapiens OX=9606 GN=IGHA1 PE=1 SV=2	0.0000	3.727E-3	31.835	29.245	222
20170803_Serum_Native_Prefraction_Run1_F1	21220	14597	20170803_Serum_Native_Prefraction_Run1_F1.18170.18170.4	64.586	4867.1479	4	1217.7943	1	HYTNPSQDVTVPCPVPSTPPTPSPSTPPTPSPSCCHPR	38	C34(160.0307);C35(160.0307);C13(160.0307)	HYTNPSQDVTVPC(160.0307)PVPSTPPTPSPSTPPTPSPSC(160.0307)C(160.0307)HPR	4135.8828	731.2651	176809.9183	0	TARGET	sp|P01876|IGHA1_HUMAN Immunoglobulin heavy constant alpha 1 OS=Homo sapiens OX=9606 GN=IGHA1 PE=1 SV=2	0.0000	1.172E-7	40.824	35.763	222
20170803_Serum_Native_Prefraction_Run1_F1	21281	14617	20170803_Serum_Native_Prefraction_Run1_F1.18194.18194.5	64.715	4866.1323	5	974.2337	1	HYTNPSQDVTVPCPVPSTPPTPSPSTPPTPSPSCCHPR	38	C34(160.0307);C35(160.0307);C13(160.0307)	HYTNPSQDVTVPC(160.0307)PVPSTPPTPSPSTPPTPSPSC(160.0307)C(160.0307)HPR	4135.8828	730.2494	176564.3359	0	TARGET	sp|P01876|IGHA1_HUMAN Immunoglobulin heavy constant alpha 1 OS=Homo sapiens OX=9606 GN=IGHA1 PE=1 SV=2	0.0000	1.125E-9	43.529	40.968	296
20170803_Serum_Native_Prefraction_Run1_F1	21319	14631	20170803_Serum_Native_Prefraction_Run1_F1.18210.18210.7	64.794	4867.1483	7	696.3142	1	HYTNPSQDVTVPCPVPSTPPTPSPSTPPTPSPSCCHPR	38	C34(160.0307);C35(160.0307);C13(160.0307)	HYTNPSQDVTVPC(160.0307)PVPSTPPTPSPSTPPTPSPSC(160.0307)C(160.0307)HPR	4135.8828	731.2655	176810.0150	0	TARGET	sp|P01876|IGHA1_HUMAN Immunoglobulin heavy constant alpha 1 OS=Homo sapiens OX=9606 GN=IGHA1 PE=1 SV=2	0.0000	3.588E-4	29.289	25.179	444
20170803_Serum_Native_Prefraction_Run1_F1	21331	14637	20170803_Serum_Native_Prefraction_Run1_F1.18217.18217.4	64.820	4704.0800	4	1177.0273	1	HYTNPSQDVTVPCPVPSTPPTPSPSTPPTPSPSCCHPR	38	C34(160.0307);C35(160.0307);C13(160.0307)	HYTNPSQDVTVPC(160.0307)PVPSTPPTPSPSTPPTPSPSC(160.0307)C(160.0307)HPR	4135.8828	568.1972	137382.3262	0	TARGET	sp|P01876|IGHA1_HUMAN Immunoglobulin heavy constant alpha 1 OS=Homo sapiens OX=9606 GN=IGHA1 PE=1 SV=2	0.0000	6.968E-5	34.102	31.485	222
20170803_Serum_Native_Prefraction_Run1_F1	21392	14670	20170803_Serum_Native_Prefraction_Run1_F1.18254.18254.4	64.948	4866.1450	4	1217.5435	1	HYTNPSQDVTVPCPVPSTPPTPSPSTPPTPSPSCCHPR	38	C34(160.0307);C35(160.0307);C13(160.0307)	HYTNPSQDVTVPC(160.0307)PVPSTPPTPSPSTPPTPSPSC(160.0307)C(160.0307)HPR	4135.8828	730.2622	176567.4308	0	TARGET	sp|P01876|IGHA1_HUMAN Immunoglobulin heavy constant alpha 1 OS=Homo sapiens OX=9606 GN=IGHA1 PE=1 SV=2	0.0000	3.264E-4	32.295	29.525	222
20170803_Serum_Native_Prefraction_Run1_F1	21456	14698	20170803_Serum_Native_Prefraction_Run1_F1.18286.18286.5	65.082	4866.1513	5	974.2375	1	HYTNPSQDVTVPCPVPSTPPTPSPSTPPTPSPSCCHPR	38	C34(160.0307);C35(160.0307);C13(160.0307)	HYTNPSQDVTVPC(160.0307)PVPSTPPTPSPSTPPTPSPSC(160.0307)C(160.0307)HPR	4135.8828	730.2685	176568.9540	0	TARGET	sp|P01876|IGHA1_HUMAN Immunoglobulin heavy constant alpha 1 OS=Homo sapiens OX=9606 GN=IGHA1 PE=1 SV=2	0.0000	2.435E-8	41.207	40.917	296
20170803_Serum_Native_Prefraction_Run1_F1	21505	14718	20170803_Serum_Native_Prefraction_Run1_F1.18309.18309.4	65.186	4704.0922	4	1177.0303	1	HYTNPSQDVTVPCPVPSTPPTPSPSTPPTPSPSCCHPR	38	C34(160.0307);C35(160.0307);C13(160.0307)	HYTNPSQDVTVPC(160.0307)PVPSTPPTPSPSTPPTPSPSC(160.0307)C(160.0307)HPR	4135.8828	568.2094	137385.2760	0	TARGET	sp|P01876|IGHA1_HUMAN Immunoglobulin heavy constant alpha 1 OS=Homo sapiens OX=9606 GN=IGHA1 PE=1 SV=2	0.0000	2.873E-4	34.263	31.619	222
20170803_Serum_Native_Prefraction_Run1_F1	21531	14730	20170803_Serum_Native_Prefraction_Run1_F1.18322.18322.4	65.238	4908.1752	4	1228.0511	1	HYTNPSQDVTVPCPVPSTPPTPSPSTPPTPSPSCCHPR	38	C34(160.0307);C35(160.0307);C13(160.0307)	HYTNPSQDVTVPC(160.0307)PVPSTPPTPSPSTPPTPSPSC(160.0307)C(160.0307)HPR	4135.8828	772.2924	186729.7594	0	TARGET	sp|P01876|IGHA1_HUMAN Immunoglobulin heavy constant alpha 1 OS=Homo sapiens OX=9606 GN=IGHA1 PE=1 SV=2	0.0000	2.306E-3	28.824	26.432	222
20170803_Serum_Native_Prefraction_Run1_F1	21568	14742	20170803_Serum_Native_Prefraction_Run1_F1.18337.18337.4	65.318	4866.1572	4	1217.5466	1	HYTNPSQDVTVPCPVPSTPPTPSPSTPPTPSPSCCHPR	38	C34(160.0307);C35(160.0307);C13(160.0307)	HYTNPSQDVTVPC(160.0307)PVPSTPPTPSPSTPPTPSPSC(160.0307)C(160.0307)HPR	4135.8828	730.2744	176570.3806	0	TARGET	sp|P01876|IGHA1_HUMAN Immunoglobulin heavy constant alpha 1 OS=Homo sapiens OX=9606 GN=IGHA1 PE=1 SV=2	0.0000	1.808E-5	38.564	31.293	222
20170803_Serum_Native_Prefraction_Run1_F1	21584	14746	20170803_Serum_Native_Prefraction_Run1_F1.18342.18342.4	65.352	4745.1181	4	1187.2868	1	HYTNPSQDVTVPCPVPSTPPTPSPSTPPTPSPSCCHPR	38	C34(160.0307);C35(160.0307);C13(160.0307)	HYTNPSQDVTVPC(160.0307)PVPSTPPTPSPSTPPTPSPSC(160.0307)C(160.0307)HPR	4135.8828	609.2353	147304.7786	0	TARGET	sp|P01876|IGHA1_HUMAN Immunoglobulin heavy constant alpha 1 OS=Homo sapiens OX=9606 GN=IGHA1 PE=1 SV=2	0.0000	4.722E-6	36.057	33.377	222
20170803_Serum_Native_Prefraction_Run1_F1	21633	14755	20170803_Serum_Native_Prefraction_Run1_F1.18354.18354.5	65.456	4704.0976	5	941.8268	1	HYTNPSQDVTVPCPVPSTPPTPSPSTPPTPSPSCCHPR	38	C34(160.0307);C35(160.0307);C13(160.0307)	HYTNPSQDVTVPC(160.0307)PVPSTPPTPSPSTPPTPSPSC(160.0307)C(160.0307)HPR	4135.8828	568.2148	137386.5817	0	TARGET	sp|P01876|IGHA1_HUMAN Immunoglobulin heavy constant alpha 1 OS=Homo sapiens OX=9606 GN=IGHA1 PE=1 SV=2	0.0000	4.664E-10	46.534	39.925	296
20170803_Serum_Native_Prefraction_Run1_F1	21635	14756	20170803_Serum_Native_Prefraction_Run1_F1.18355.18355.4	65.460	4501.0161	4	1126.2613	1	HYTNPSQDVTVPCPVPSTPPTPSPSTPPTPSPSCCHPR	38	C34(160.0307);C35(160.0307);C13(160.0307)	HYTNPSQDVTVPC(160.0307)PVPSTPPTPSPSTPPTPSPSC(160.0307)C(160.0307)HPR	4135.8828	365.1333	88284.2473	0	TARGET	sp|P01876|IGHA1_HUMAN Immunoglobulin heavy constant alpha 1 OS=Homo sapiens OX=9606 GN=IGHA1 PE=1 SV=2	0.0000	1.976E-7	41.492	34.029	222
20170803_Serum_Native_Prefraction_Run1_F1	21681	14770	20170803_Serum_Native_Prefraction_Run1_F1.18372.18372.4	65.558	4704.0947	4	1177.0310	1	HYTNPSQDVTVPCPVPSTPPTPSPSTPPTPSPSCCHPR	38	C34(160.0307);C35(160.0307);C13(160.0307)	HYTNPSQDVTVPC(160.0307)PVPSTPPTPSPSTPPTPSPSC(160.0307)C(160.0307)HPR	4135.8828	568.2119	137385.8805	0	TARGET	sp|P01876|IGHA1_HUMAN Immunoglobulin heavy constant alpha 1 OS=Homo sapiens OX=9606 GN=IGHA1 PE=1 SV=2	0.0000	6.178E-3	30.431	27.890	222
20170803_Serum_Native_Prefraction_Run1_F1	21763	14796	20170803_Serum_Native_Prefraction_Run1_F1.18403.18403.3	65.731	4500.9873	3	1501.3364	1	HYTNPSQDVTVPCPVPSTPPTPSPSTPPTPSPSCCHPR	38	C34(160.0307);C35(160.0307);C13(160.0307)	HYTNPSQDVTVPC(160.0307)PVPSTPPTPSPSTPPTPSPSC(160.0307)C(160.0307)HPR	4135.8828	365.1045	88277.2839	0	TARGET	sp|P01876|IGHA1_HUMAN Immunoglobulin heavy constant alpha 1 OS=Homo sapiens OX=9606 GN=IGHA1 PE=1 SV=2	0.0000	1.048E-5	33.026	25.590	148
20170803_Serum_Native_Prefraction_Run1_F1	21798	14807	20170803_Serum_Native_Prefraction_Run1_F1.18416.18416.4	65.804	4543.0356	4	1136.7662	1	HYTNPSQDVTVPCPVPSTPPTPSPSTPPTPSPSCCHPR	38	C34(160.0307);C35(160.0307);C13(160.0307)	HYTNPSQDVTVPC(160.0307)PVPSTPPTPSPSTPPTPSPSC(160.0307)C(160.0307)HPR	4135.8828	407.1528	98443.9888	0	TARGET	sp|P01876|IGHA1_HUMAN Immunoglobulin heavy constant alpha 1 OS=Homo sapiens OX=9606 GN=IGHA1 PE=1 SV=2	0.0000	1.997E-5	36.625	29.376	222
20170803_Serum_Native_Prefraction_Run1_F1	21809	14811	20170803_Serum_Native_Prefraction_Run1_F1.18421.18421.5	65.828	4501.0097	5	901.2092	1	HYTNPSQDVTVPCPVPSTPPTPSPSTPPTPSPSCCHPR	38	C34(160.0307);C35(160.0307);C13(160.0307)	HYTNPSQDVTVPC(160.0307)PVPSTPPTPSPSTPPTPSPSC(160.0307)C(160.0307)HPR	4135.8828	365.1269	88282.6999	0	TARGET	sp|P01876|IGHA1_HUMAN Immunoglobulin heavy constant alpha 1 OS=Homo sapiens OX=9606 GN=IGHA1 PE=1 SV=2	0.0000	1.042E-11	51.515	44.185	296
20170803_Serum_Native_Prefraction_Run1_F1	22100	14924	20170803_Serum_Native_Prefraction_Run1_F1.18552.18552.5	66.439	4501.0209	5	901.2115	1	HYTNPSQDVTVPCPVPSTPPTPSPSTPPTPSPSCCHPR	38	C34(160.0307);C35(160.0307);C13(160.0307)	HYTNPSQDVTVPC(160.0307)PVPSTPPTPSPSTPPTPSPSC(160.0307)C(160.0307)HPR	4135.8828	365.1381	88285.4079	0	TARGET	sp|P01876|IGHA1_HUMAN Immunoglobulin heavy constant alpha 1 OS=Homo sapiens OX=9606 GN=IGHA1 PE=1 SV=2	0.0000	1.861E-9	44.046	41.486	296
20170803_Serum_Native_Prefraction_Run1_F1	22114	14927	20170803_Serum_Native_Prefraction_Run1_F1.18556.18556.4	66.469	4704.1191	4	1177.0371	1	HYTNPSQDVTVPCPVPSTPPTPSPSTPPTPSPSCCHPR	38	C34(160.0307);C35(160.0307);C13(160.0307)	HYTNPSQDVTVPC(160.0307)PVPSTPPTPSPSTPPTPSPSC(160.0307)C(160.0307)HPR	4135.8828	568.2363	137391.7801	0	TARGET	sp|P01876|IGHA1_HUMAN Immunoglobulin heavy constant alpha 1 OS=Homo sapiens OX=9606 GN=IGHA1 PE=1 SV=2	0.0000	5.959E-3	30.083	27.515	222
20170803_Serum_Native_Prefraction_Run1_F1	22444	15027	20170803_Serum_Native_Prefraction_Run1_F1.18676.18676.5	67.164	4996.1806	5	1000.2434	1	HYTNPSQDVTVPCPVPSTPPTPSPSTPPTPSPSCCHPR	38	C34(160.0307);C35(160.0307);C13(160.0307)	HYTNPSQDVTVPC(160.0307)PVPSTPPTPSPSTPPTPSPSC(160.0307)C(160.0307)HPR	4135.8828	860.2978	208008.2637	0	TARGET	sp|P01876|IGHA1_HUMAN Immunoglobulin heavy constant alpha 1 OS=Homo sapiens OX=9606 GN=IGHA1 PE=1 SV=2	0.0000	3.527E-3	21.892	16.997	296
20170803_Serum_Native_Prefraction_Run1_F1	22519	15043	20170803_Serum_Native_Prefraction_Run1_F1.18697.18697.5	67.324	4339.9540	5	868.9981	1	HYTNPSQDVTVPCPVPSTPPTPSPSTPPTPSPSCCHPR	38	C34(160.0307);C35(160.0307);C13(160.0307)	HYTNPSQDVTVPC(160.0307)PVPSTPPTPSPSTPPTPSPSC(160.0307)C(160.0307)HPR	4135.8828	204.0712	49341.6303	0	TARGET	sp|P01876|IGHA1_HUMAN Immunoglobulin heavy constant alpha 1 OS=Homo sapiens OX=9606 GN=IGHA1 PE=1 SV=2	0.0000	1.706E-3	21.826	19.590	296
20170803_Serum_Native_Prefraction_Run1_F1	22560	15051	20170803_Serum_Native_Prefraction_Run1_F1.18708.18708.4	67.411	4338.9741	4	1085.7508	1	HYTNPSQDVTVPCPVPSTPPTPSPSTPPTPSPSCCHPR	38	C34(160.0307);C35(160.0307);C13(160.0307)	HYTNPSQDVTVPC(160.0307)PVPSTPPTPSPSTPPTPSPSC(160.0307)C(160.0307)HPR	4135.8828	203.0913	49104.7038	0	TARGET	sp|P01876|IGHA1_HUMAN Immunoglobulin heavy constant alpha 1 OS=Homo sapiens OX=9606 GN=IGHA1 PE=1 SV=2	0.0000	2.831E-9	43.939	41.327	222
20170803_Serum_Native_Prefraction_Run1_F1	22791	15137	20170803_Serum_Native_Prefraction_Run1_F1.18815.18815.4	67.914	4794.1015	4	1199.5327	1	HYTNPSQDVTVPCPVPSTPPTPSPSTPPTPSPSCCHPR	38	C34(160.0307);C35(160.0307);Q7(129.0426);C13(160.0307)	HYTNPSQ(129.0426)DVTVPC(160.0307)PVPSTPPTPSPSTPPTPSPSC(160.0307)C(160.0307)HPR	4136.8667	657.2348	158872.6076	0	TARGET	sp|P01876|IGHA1_HUMAN Immunoglobulin heavy constant alpha 1 OS=Homo sapiens OX=9606 GN=IGHA1 PE=1 SV=2	0.0000	2.623E-3	29.577	27.613	222
20170803_Serum_Native_Prefraction_Run1_F1	22967	15221	20170803_Serum_Native_Prefraction_Run1_F1.18912.18912.4	68.288	4792.1323	4	1199.0404	1	HYTNPSQDVTVPCPVPSTPPTPSPSTPPTPSPSCCHPR	38	C34(160.0307);C35(160.0307);C13(160.0307)	HYTNPSQDVTVPC(160.0307)PVPSTPPTPSPSTPPTPSPSC(160.0307)C(160.0307)HPR	4135.8828	656.2495	158672.1703	0	TARGET	sp|P01876|IGHA1_HUMAN Immunoglobulin heavy constant alpha 1 OS=Homo sapiens OX=9606 GN=IGHA1 PE=1 SV=2	0.0000	9.587E-4	32.222	29.653	222
20170803_Serum_Native_Prefraction_Run1_F1	23511	15455	20170803_Serum_Native_Prefraction_Run1_F1.19180.19180.3	69.438	2671.2888	3	891.4369	1	TVVQPSVGAAAGPVVPPCPGR	21	C18(160.0307)	TVVQPSVGAAAGPVVPPC(160.0307)PGR	2015.0621	656.2266	325660.7327	0	TARGET	sp|P02765|FETUA_HUMAN Alpha-2-HS-glycoprotein OS=Homo sapiens OX=9606 GN=AHSG PE=1 SV=1	0.0000	1.88E-9	44.794	35.606	80
20170803_Serum_Native_Prefraction_Run1_F1	23542	15469	20170803_Serum_Native_Prefraction_Run1_F1.19196.19196.2	69.504	2671.2907	2	1336.6526	1	TVVQPSVGAAAGPVVPPCPGR	21	C18(160.0307)	TVVQPSVGAAAGPVVPPC(160.0307)PGR	2015.0621	656.2286	325661.7253	0	TARGET	sp|P02765|FETUA_HUMAN Alpha-2-HS-glycoprotein OS=Homo sapiens OX=9606 GN=AHSG PE=1 SV=1	0.0000	3.55E-7	29.660	27.992	40
20170803_Serum_Native_Prefraction_Run1_F1	23682	15551	20170803_Serum_Native_Prefraction_Run1_F1.19287.19287.3	69.800	2671.2944	3	891.4387	1	TVVQPSVGAAAGPVVPPCPGR	21	C18(160.0307)	TVVQPSVGAAAGPVVPPC(160.0307)PGR	2015.0621	656.2323	325663.5614	0	TARGET	sp|P02765|FETUA_HUMAN Alpha-2-HS-glycoprotein OS=Homo sapiens OX=9606 GN=AHSG PE=1 SV=1	0.0000	2.98E-9	42.350	33.749	80
20170803_Serum_Native_Prefraction_Run1_F1	23849	15674	20170803_Serum_Native_Prefraction_Run1_F1.19424.19424.3	70.163	2671.2910	3	891.4376	1	TVVQPSVGAAAGPVVPPCPGR	21	C18(160.0307)	TVVQPSVGAAAGPVVPPC(160.0307)PGR	2015.0621	656.2288	325661.8245	0	TARGET	sp|P02765|FETUA_HUMAN Alpha-2-HS-glycoprotein OS=Homo sapiens OX=9606 GN=AHSG PE=1 SV=1	0.0000	4.574E-7	38.368	36.210	80
20170803_Serum_Native_Prefraction_Run1_F1	24318	15991	20170803_Serum_Native_Prefraction_Run1_F1.19772.19772.3	71.155	2962.3891	3	988.4703	1	TVVQPSVGAAAGPVVPPCPGR	21	C18(160.0307)	TVVQPSVGAAAGPVVPPC(160.0307)PGR	2015.0621	947.3270	470122.9803	0	TARGET	sp|P02765|FETUA_HUMAN Alpha-2-HS-glycoprotein OS=Homo sapiens OX=9606 GN=AHSG PE=1 SV=1	0.0000	1.651E-4	26.494	23.104	80
20170803_Serum_Native_Prefraction_Run1_F1	24481	16092	20170803_Serum_Native_Prefraction_Run1_F1.19883.19883.3	71.500	2962.3767	3	988.4662	1	TVVQPSVGAAAGPVVPPCPGR	21	C18(160.0307)	TVVQPSVGAAAGPVVPPC(160.0307)PGR	2015.0621	947.3145	470116.7770	0	TARGET	sp|P02765|FETUA_HUMAN Alpha-2-HS-glycoprotein OS=Homo sapiens OX=9606 GN=AHSG PE=1 SV=1	0.0000	1.026E-3	23.560	23.252	80
20170803_Serum_Native_Prefraction_Run1_F1	29259	19232	20170803_Serum_Native_Prefraction_Run1_F1.23335.23335.4	81.595	4950.1606	4	1238.5474	1	GVAHNNLMAMAQETGDNLYWGSVTGSQSNAVSPTPAPR	38	N5(115.0269);M8(147.0354);M10(147.0354)	GVAHN(115.0269)NLM(147.0354)AM(147.0354)AQETGDNLYWGSVTGSQSNAVSPTPAPR	3960.8005	989.3601	249787.9153	0	TARGET	sp|P0C0L5|CO4B_HUMAN Complement C4-B OS=Homo sapiens OX=9606 GN=C4B PE=1 SV=2	0.0000	1.127E-4	29.751	29.751	222
20170803_Serum_Native_Prefraction_Run1_F1	30231	19771	20170803_Serum_Native_Prefraction_Run1_F1.23941.23941.3	83.665	3104.4013	3	1035.8077	1	TFVLSALQPSPTHSSSNTQR	20		TFVLSALQPSPTHSSSNTQR	2157.0813	947.3200	439167.4992	0	TARGET	sp|P19827|ITIH1_HUMAN Inter-alpha-trypsin inhibitor heavy chain H1 OS=Homo sapiens OX=9606 GN=ITIH1 PE=1 SV=3	0.0000	6.152E-6	34.117	27.479	76
20170803_Serum_Native_Prefraction_Run1_F1	33587	22079	20170803_Serum_Native_Prefraction_Run1_F1.26469.26469.4	90.773	4893.1459	4	1224.2938	1	GVAHNNLMAMAQETGDNLYWGSVTGSQSNAVSPTPAPR	38	M10(147.0354);Q12(129.0426);Q27(129.0426)	GVAHNNLMAM(147.0354)AQ(129.0426)ETGDNLYWGSVTGSQ(129.0426)SNAVSPTPAPR	3945.7896	947.3564	240092.9842	0	TARGET	sp|P0C0L5|CO4B_HUMAN Complement C4-B OS=Homo sapiens OX=9606 GN=C4B PE=1 SV=2	0.0000	3.747E-8	52.397	52.385	222
20170803_Serum_Native_Prefraction_Run1_F1	33788	22211	20170803_Serum_Native_Prefraction_Run1_F1.26615.26615.5	91.201	4891.1430	5	979.2359	1	GVAHNNLMAMAQETGDNLYWGSVTGSQSNAVSPTPAPR	38	M8(147.0354)	GVAHNNLM(147.0354)AMAQETGDNLYWGSVTGSQSNAVSPTPAPR	3943.8215	947.3215	240203.9494	0	TARGET	sp|P0C0L5|CO4B_HUMAN Complement C4-B OS=Homo sapiens OX=9606 GN=C4B PE=1 SV=2	0.0000	2.931E-4	51.645	51.600	296
20170803_Serum_Native_Prefraction_Run1_F1	42403	27352	20170803_Serum_Native_Prefraction_Run1_F1.32382.32382.4	109.667	4937.1791	4	1235.3021	1	GVAHNNLMAMAQETGDNLYWGSVTGSQSNAVSPTPAPR	38	N5(115.0269);M8(147.0354);M10(147.0354);Q12(129.0426);N29(115.0269)	GVAHN(115.0269)NLM(147.0354)AM(147.0354)AQ(129.0426)ETGDNLYWGSVTGSQSN(115.0269)AVSPTPAPR	3962.7686	974.4106	245891.3700	0	TARGET	sp|P0C0L5|CO4B_HUMAN Complement C4-B OS=Homo sapiens OX=9606 GN=C4B PE=1 SV=2	0.0000	7.385E-4	29.897	29.897	222
20170803_Serum_Native_Prefraction_Run1_F1	42719	27532	20170803_Serum_Native_Prefraction_Run1_F1.32589.32589.4	110.358	4934.1796	4	1234.5522	1	GVAHNNLMAMAQETGDNLYWGSVTGSQSNAVSPTPAPR	38	N5(115.0269);M8(147.0354)	GVAHN(115.0269)NLM(147.0354)AMAQETGDNLYWGSVTGSQSNAVSPTPAPR	3944.8057	989.3740	250804.2411	0	TARGET	sp|P0C0L5|CO4B_HUMAN Complement C4-B OS=Homo sapiens OX=9606 GN=C4B PE=1 SV=2	0.0000	6.236E-3	25.767	25.747	222
20170803_Serum_Native_Prefraction_Run1_F1	43499	27983	20170803_Serum_Native_Prefraction_Run1_F1.33118.33118.4	112.092	4934.1723	4	1234.5504	1	GVAHNNLMAMAQETGDNLYWGSVTGSQSNAVSPTPAPR	38	N5(115.0269);N6(115.0269);M10(147.0354)	GVAHN(115.0269)N(115.0269)LMAM(147.0354)AQETGDNLYWGSVTGSQSNAVSPTPAPR	3945.7896	988.3828	250490.4975	0	TARGET	sp|P0C0L5|CO4B_HUMAN Complement C4-B OS=Homo sapiens OX=9606 GN=C4B PE=1 SV=2	0.0000	3.617E-4	33.230	32.818	222
20170803_Serum_Native_Prefraction_Run1_F10	18482	9806	20170803_Serum_Native_Prefraction_Run1_F10.14778.14778.4	63.921	4908.1713	4	1228.0501	1	HYTNPSQDVTVPCPVPSTPPTPSPSTPPTPSPSCCHPR	38	C34(160.0307);C35(160.0307);C13(160.0307)	HYTNPSQDVTVPC(160.0307)PVPSTPPTPSPSTPPTPSPSC(160.0307)C(160.0307)HPR	4135.8828	772.2885	186728.8164	0	TARGET	sp|P01876|IGHA1_HUMAN Immunoglobulin heavy constant alpha 1 OS=Homo sapiens OX=9606 GN=IGHA1 PE=1 SV=2	0.0000	6.571E-5	29.995	25.095	222
20170803_Serum_Native_Prefraction_Run1_F10	18828	9841	20170803_Serum_Native_Prefraction_Run1_F10.14835.14835.4	64.651	4866.1440	4	1217.5433	1	HYTNPSQDVTVPCPVPSTPPTPSPSTPPTPSPSCCHPR	38	C34(160.0307);C35(160.0307);C13(160.0307)	HYTNPSQDVTVPC(160.0307)PVPSTPPTPSPSTPPTPSPSC(160.0307)C(160.0307)HPR	4135.8828	730.2612	176567.1890	0	TARGET	sp|P01876|IGHA1_HUMAN Immunoglobulin heavy constant alpha 1 OS=Homo sapiens OX=9606 GN=IGHA1 PE=1 SV=2	0.0000	5.416E-6	36.196	29.311	222
20170803_Serum_Native_Prefraction_Run1_F10	19812	9965	20170803_Serum_Native_Prefraction_Run1_F10.15020.15020.4	66.727	4995.1855	4	1249.8037	1	HYTNPSQDVTVPCPVPSTPPTPSPSTPPTPSPSCCHPR	38	C34(160.0307);C35(160.0307);C13(160.0307)	HYTNPSQDVTVPC(160.0307)PVPSTPPTPSPSTPPTPSPSC(160.0307)C(160.0307)HPR	4135.8828	859.3027	207767.6621	0	TARGET	sp|P01876|IGHA1_HUMAN Immunoglobulin heavy constant alpha 1 OS=Homo sapiens OX=9606 GN=IGHA1 PE=1 SV=2	0.0000	9.107E-6	36.857	33.994	222
20170803_Serum_Native_Prefraction_Run1_F10	19979	10004	20170803_Serum_Native_Prefraction_Run1_F10.15070.15070.4	67.083	4995.1909	4	1249.8050	1	HYTNPSQDVTVPCPVPSTPPTPSPSTPPTPSPSCCHPR	38	C34(160.0307);C35(160.0307);C13(160.0307)	HYTNPSQDVTVPC(160.0307)PVPSTPPTPSPSTPPTPSPSC(160.0307)C(160.0307)HPR	4135.8828	859.3081	207768.9677	0	TARGET	sp|P01876|IGHA1_HUMAN Immunoglobulin heavy constant alpha 1 OS=Homo sapiens OX=9606 GN=IGHA1 PE=1 SV=2	0.0000	3.151E-3	32.122	29.433	222
20170803_Serum_Native_Prefraction_Run1_F10	20028	10009	20170803_Serum_Native_Prefraction_Run1_F10.15078.15078.5	67.187	4995.1889	5	1000.0451	1	HYTNPSQDVTVPCPVPSTPPTPSPSTPPTPSPSCCHPR	38	C34(160.0307);C35(160.0307);C13(160.0307)	HYTNPSQDVTVPC(160.0307)PVPSTPPTPSPSTPPTPSPSC(160.0307)C(160.0307)HPR	4135.8828	859.3061	207768.4842	0	TARGET	sp|P01876|IGHA1_HUMAN Immunoglobulin heavy constant alpha 1 OS=Homo sapiens OX=9606 GN=IGHA1 PE=1 SV=2	0.0000	6.263E-10	45.937	45.656	296
20170803_Serum_Native_Prefraction_Run1_F10	20091	10023	20170803_Serum_Native_Prefraction_Run1_F10.15096.15096.6	67.320	4995.1821	6	833.5376	1	HYTNPSQDVTVPCPVPSTPPTPSPSTPPTPSPSCCHPR	38	C34(160.0307);C35(160.0307);C13(160.0307)	HYTNPSQDVTVPC(160.0307)PVPSTPPTPSPSTPPTPSPSC(160.0307)C(160.0307)HPR	4135.8828	859.2992	207766.8158	0	TARGET	sp|P01876|IGHA1_HUMAN Immunoglobulin heavy constant alpha 1 OS=Homo sapiens OX=9606 GN=IGHA1 PE=1 SV=2	0.0000	6.067E-5	23.670	22.035	370
20170803_Serum_Native_Prefraction_Run1_F10	20183	10041	20170803_Serum_Native_Prefraction_Run1_F10.15119.15119.4	67.514	4792.1059	4	1199.0338	1	HYTNPSQDVTVPCPVPSTPPTPSPSTPPTPSPSCCHPR	38	C34(160.0307);C35(160.0307);C13(160.0307)	HYTNPSQDVTVPC(160.0307)PVPSTPPTPSPSTPPTPSPSC(160.0307)C(160.0307)HPR	4135.8828	656.2231	158665.7871	0	TARGET	sp|P01876|IGHA1_HUMAN Immunoglobulin heavy constant alpha 1 OS=Homo sapiens OX=9606 GN=IGHA1 PE=1 SV=2	0.0000	6.5E-4	29.677	22.871	222
20170803_Serum_Native_Prefraction_Run1_F10	20246	10056	20170803_Serum_Native_Prefraction_Run1_F10.15138.15138.5	67.647	4792.1074	5	959.4288	1	HYTNPSQDVTVPCPVPSTPPTPSPSTPPTPSPSCCHPR	38	C34(160.0307);C35(160.0307);C13(160.0307)	HYTNPSQDVTVPC(160.0307)PVPSTPPTPSPSTPPTPSPSC(160.0307)C(160.0307)HPR	4135.8828	656.2245	158666.1256	0	TARGET	sp|P01876|IGHA1_HUMAN Immunoglobulin heavy constant alpha 1 OS=Homo sapiens OX=9606 GN=IGHA1 PE=1 SV=2	0.0000	1.1E-8	41.455	36.628	296
20170803_Serum_Native_Prefraction_Run1_F10	20347	10092	20170803_Serum_Native_Prefraction_Run1_F10.15181.15181.4	67.863	4792.1088	4	1199.0345	1	HYTNPSQDVTVPCPVPSTPPTPSPSTPPTPSPSCCHPR	38	C34(160.0307);C35(160.0307);C13(160.0307)	HYTNPSQDVTVPC(160.0307)PVPSTPPTPSPSTPPTPSPSC(160.0307)C(160.0307)HPR	4135.8828	656.2260	158666.4883	0	TARGET	sp|P01876|IGHA1_HUMAN Immunoglobulin heavy constant alpha 1 OS=Homo sapiens OX=9606 GN=IGHA1 PE=1 SV=2	0.0000	1.461E-8	41.182	36.023	222
20170803_Serum_Native_Prefraction_Run1_F10	20410	10124	20170803_Serum_Native_Prefraction_Run1_F10.15217.15217.5	67.997	4792.1118	5	959.4296	1	HYTNPSQDVTVPCPVPSTPPTPSPSTPPTPSPSCCHPR	38	C34(160.0307);C35(160.0307);C13(160.0307)	HYTNPSQDVTVPC(160.0307)PVPSTPPTPSPSTPPTPSPSC(160.0307)C(160.0307)HPR	4135.8828	656.2289	158667.1895	0	TARGET	sp|P01876|IGHA1_HUMAN Immunoglobulin heavy constant alpha 1 OS=Homo sapiens OX=9606 GN=IGHA1 PE=1 SV=2	0.0000	9.961E-11	46.584	41.717	296
20170803_Serum_Native_Prefraction_Run1_F10	20458	10153	20170803_Serum_Native_Prefraction_Run1_F10.15249.15249.6	68.098	4792.1176	6	799.6935	1	HYTNPSQDVTVPCPVPSTPPTPSPSTPPTPSPSCCHPR	38	C34(160.0307);C35(160.0307);C13(160.0307)	HYTNPSQDVTVPC(160.0307)PVPSTPPTPSPSTPPTPSPSC(160.0307)C(160.0307)HPR	4135.8828	656.2348	158668.6160	0	TARGET	sp|P01876|IGHA1_HUMAN Immunoglobulin heavy constant alpha 1 OS=Homo sapiens OX=9606 GN=IGHA1 PE=1 SV=2	0.0000	6.775E-8	41.605	39.127	370
20170803_Serum_Native_Prefraction_Run1_F10	20522	10188	20170803_Serum_Native_Prefraction_Run1_F10.15288.15288.4	68.232	4792.1108	4	1199.0350	1	HYTNPSQDVTVPCPVPSTPPTPSPSTPPTPSPSCCHPR	38	C34(160.0307);C35(160.0307);C13(160.0307)	HYTNPSQDVTVPC(160.0307)PVPSTPPTPSPSTPPTPSPSC(160.0307)C(160.0307)HPR	4135.8828	656.2280	158666.9719	0	TARGET	sp|P01876|IGHA1_HUMAN Immunoglobulin heavy constant alpha 1 OS=Homo sapiens OX=9606 GN=IGHA1 PE=1 SV=2	0.0000	2.363E-5	34.253	34.031	222
20170803_Serum_Native_Prefraction_Run1_F10	20758	10266	20170803_Serum_Native_Prefraction_Run1_F10.15380.15380.3	68.730	2671.2839	3	891.4352	1	TVVQPSVGAAAGPVVPPCPGR	21	C18(160.0307)	TVVQPSVGAAAGPVVPPC(160.0307)PGR	2015.0621	656.2218	325658.3507	0	TARGET	sp|P02765|FETUA_HUMAN Alpha-2-HS-glycoprotein OS=Homo sapiens OX=9606 GN=AHSG PE=1 SV=1	0.0000	4.013E-4	24.892	23.324	80
20170803_Serum_Native_Prefraction_Run1_F10	20781	10274	20170803_Serum_Native_Prefraction_Run1_F10.15390.15390.2	68.779	2671.2883	2	1336.6514	1	TVVQPSVGAAAGPVVPPCPGR	21	C18(160.0307)	TVVQPSVGAAAGPVVPPC(160.0307)PGR	2015.0621	656.2262	325660.5342	0	TARGET	sp|P02765|FETUA_HUMAN Alpha-2-HS-glycoprotein OS=Homo sapiens OX=9606 GN=AHSG PE=1 SV=1	0.0000	1.967E-7	28.833	25.578	40
20170803_Serum_Native_Prefraction_Run1_F10	20798	10281	20170803_Serum_Native_Prefraction_Run1_F10.15398.15398.4	68.815	2671.2863	4	668.8289	1	TVVQPSVGAAAGPVVPPCPGR	21	C18(160.0307)	TVVQPSVGAAAGPVVPPC(160.0307)PGR	2015.0621	656.2242	325659.5417	0	TARGET	sp|P02765|FETUA_HUMAN Alpha-2-HS-glycoprotein OS=Homo sapiens OX=9606 GN=AHSG PE=1 SV=1	0.0000	7.358E-4	24.034	19.099	120
20170803_Serum_Native_Prefraction_Run1_F10	20922	10327	20170803_Serum_Native_Prefraction_Run1_F10.15452.15452.3	69.078	2671.2895	3	891.4371	1	TVVQPSVGAAAGPVVPPCPGR	21	C18(160.0307)	TVVQPSVGAAAGPVVPPC(160.0307)PGR	2015.0621	656.2274	325661.1297	0	TARGET	sp|P02765|FETUA_HUMAN Alpha-2-HS-glycoprotein OS=Homo sapiens OX=9606 GN=AHSG PE=1 SV=1	0.0000	9.802E-11	47.299	36.380	80
20170803_Serum_Native_Prefraction_Run1_F10	20954	10346	20170803_Serum_Native_Prefraction_Run1_F10.15473.15473.2	69.144	2671.2878	2	1336.6512	1	TVVQPSVGAAAGPVVPPCPGR	21	C18(160.0307)	TVVQPSVGAAAGPVVPPC(160.0307)PGR	2015.0621	656.2257	325660.2861	0	TARGET	sp|P02765|FETUA_HUMAN Alpha-2-HS-glycoprotein OS=Homo sapiens OX=9606 GN=AHSG PE=1 SV=1	0.0000	5.101E-8	35.006	25.690	40
20170803_Serum_Native_Prefraction_Run1_F10	21078	10421	20170803_Serum_Native_Prefraction_Run1_F10.15567.15567.3	69.436	2671.2868	3	891.4362	1	TVVQPSVGAAAGPVVPPCPGR	21	C18(160.0307)	TVVQPSVGAAAGPVVPPC(160.0307)PGR	2015.0621	656.2247	325659.7898	0	TARGET	sp|P02765|FETUA_HUMAN Alpha-2-HS-glycoprotein OS=Homo sapiens OX=9606 GN=AHSG PE=1 SV=1	0.0000	2.49E-10	49.750	38.287	80
20170803_Serum_Native_Prefraction_Run1_F10	21105	10441	20170803_Serum_Native_Prefraction_Run1_F10.15589.15589.2	69.493	2671.2903	2	1336.6524	1	TVVQPSVGAAAGPVVPPCPGR	21	C18(160.0307)	TVVQPSVGAAAGPVVPPC(160.0307)PGR	2015.0621	656.2281	325661.4771	0	TARGET	sp|P02765|FETUA_HUMAN Alpha-2-HS-glycoprotein OS=Homo sapiens OX=9606 GN=AHSG PE=1 SV=1	0.0000	2.074E-11	47.363	37.042	40
20170803_Serum_Native_Prefraction_Run1_F10	21249	10503	20170803_Serum_Native_Prefraction_Run1_F10.15661.15661.3	69.797	2671.2856	3	891.4358	1	TVVQPSVGAAAGPVVPPCPGR	21	C18(160.0307)	TVVQPSVGAAAGPVVPPC(160.0307)PGR	2015.0621	656.2235	325659.1943	0	TARGET	sp|P02765|FETUA_HUMAN Alpha-2-HS-glycoprotein OS=Homo sapiens OX=9606 GN=AHSG PE=1 SV=1	0.0000	2.718E-8	42.231	31.238	80
20170803_Serum_Native_Prefraction_Run1_F10	21279	10522	20170803_Serum_Native_Prefraction_Run1_F10.15682.15682.2	69.861	2671.2915	2	1336.6530	1	TVVQPSVGAAAGPVVPPCPGR	21	C18(160.0307)	TVVQPSVGAAAGPVVPPC(160.0307)PGR	2015.0621	656.2293	325662.0726	0	TARGET	sp|P02765|FETUA_HUMAN Alpha-2-HS-glycoprotein OS=Homo sapiens OX=9606 GN=AHSG PE=1 SV=1	0.0000	8.623E-7	32.969	25.802	40
20170803_Serum_Native_Prefraction_Run1_F10	21418	10570	20170803_Serum_Native_Prefraction_Run1_F10.15739.15739.3	70.153	2671.2885	3	891.4368	1	TVVQPSVGAAAGPVVPPCPGR	21	C18(160.0307)	TVVQPSVGAAAGPVVPPC(160.0307)PGR	2015.0621	656.2264	325660.6335	0	TARGET	sp|P02765|FETUA_HUMAN Alpha-2-HS-glycoprotein OS=Homo sapiens OX=9606 GN=AHSG PE=1 SV=1	0.0000	2.943E-5	39.723	30.724	80
20170803_Serum_Native_Prefraction_Run1_F10	21453	10584	20170803_Serum_Native_Prefraction_Run1_F10.15755.15755.2	70.227	2671.2954	2	1336.6550	1	TVVQPSVGAAAGPVVPPCPGR	21	C18(160.0307)	TVVQPSVGAAAGPVVPPC(160.0307)PGR	2015.0621	656.2333	325664.0577	0	TARGET	sp|P02765|FETUA_HUMAN Alpha-2-HS-glycoprotein OS=Homo sapiens OX=9606 GN=AHSG PE=1 SV=1	0.0000	1.778E-7	32.169	30.476	40
20170803_Serum_Native_Prefraction_Run1_F10	21578	10612	20170803_Serum_Native_Prefraction_Run1_F10.15791.15791.3	70.494	2671.2905	3	891.4374	1	TVVQPSVGAAAGPVVPPCPGR	21	C18(160.0307)	TVVQPSVGAAAGPVVPPC(160.0307)PGR	2015.0621	656.2284	325661.6260	0	TARGET	sp|P02765|FETUA_HUMAN Alpha-2-HS-glycoprotein OS=Homo sapiens OX=9606 GN=AHSG PE=1 SV=1	0.0000	5.134E-6	39.834	28.890	80
20170803_Serum_Native_Prefraction_Run1_F10	21626	10626	20170803_Serum_Native_Prefraction_Run1_F10.15808.15808.2	70.596	2671.3012	2	1336.6579	1	TVVQPSVGAAAGPVVPPCPGR	21	C18(160.0307)	TVVQPSVGAAAGPVVPPC(160.0307)PGR	2015.0621	656.2391	325666.9360	0	TARGET	sp|P02765|FETUA_HUMAN Alpha-2-HS-glycoprotein OS=Homo sapiens OX=9606 GN=AHSG PE=1 SV=1	0.0000	4.478E-4	21.365	19.645	40
20170803_Serum_Native_Prefraction_Run1_F10	21738	10652	20170803_Serum_Native_Prefraction_Run1_F10.15841.15841.3	70.835	2671.2888	3	891.4369	1	TVVQPSVGAAAGPVVPPCPGR	21	C18(160.0307)	TVVQPSVGAAAGPVVPPC(160.0307)PGR	2015.0621	656.2266	325660.7327	0	TARGET	sp|P02765|FETUA_HUMAN Alpha-2-HS-glycoprotein OS=Homo sapiens OX=9606 GN=AHSG PE=1 SV=1	0.0000	1.764E-7	37.541	29.644	80
20170803_Serum_Native_Prefraction_Run1_F10	21813	10680	20170803_Serum_Native_Prefraction_Run1_F10.15873.15873.3	70.992	2962.3842	3	988.4687	1	TVVQPSVGAAAGPVVPPCPGR	21	C18(160.0307)	TVVQPSVGAAAGPVVPPC(160.0307)PGR	2015.0621	947.3221	470120.5486	0	TARGET	sp|P02765|FETUA_HUMAN Alpha-2-HS-glycoprotein OS=Homo sapiens OX=9606 GN=AHSG PE=1 SV=1	0.0000	6.187E-3	26.171	20.346	80
20170803_Serum_Native_Prefraction_Run1_F10	21901	10709	20170803_Serum_Native_Prefraction_Run1_F10.15908.15908.3	71.181	2671.2873	3	891.4364	1	TVVQPSVGAAAGPVVPPCPGR	21	C18(160.0307)	TVVQPSVGAAAGPVVPPC(160.0307)PGR	2015.0621	656.2252	325660.0380	0	TARGET	sp|P02765|FETUA_HUMAN Alpha-2-HS-glycoprotein OS=Homo sapiens OX=9606 GN=AHSG PE=1 SV=1	0.0000	3.942E-4	22.974	22.083	80
20170803_Serum_Native_Prefraction_Run1_F10	25451	13284	20170803_Serum_Native_Prefraction_Run1_F10.18723.18723.4	78.730	4585.8164	4	1147.4614	1	KCQCDELCSYYQSCCTDYTAECKPQVTR	28	C2(160.0307);Q3(129.0426);C4(160.0307);C8(160.0307);Q12(129.0426);C14(160.0307);C15(160.0307);C22(160.0307)	KC(160.0307)Q(129.0426)C(160.0307)DELC(160.0307)SYYQ(129.0426)SC(160.0307)C(160.0307)TDYTAEC(160.0307)KPQVTR	3611.4075	974.4089	269814.1653	1	TARGET	sp|P04004|VTNC_HUMAN Vitronectin OS=Homo sapiens OX=9606 GN=VTN PE=1 SV=1	0.0000	8.649E-4	21.951	21.506	162
20170803_Serum_Native_Prefraction_Run1_F10	26366	13978	20170803_Serum_Native_Prefraction_Run1_F10.19481.19481.3	80.663	3939.6777	3	1314.2332	1	VQNHCQEPYYQAAAAGALTCATPGTWK	27	C5(160.0307);C20(160.0307)	VQNHC(160.0307)QEPYYQAAAAGALTC(160.0307)ATPGTWK	2992.3596	947.3181	316578.9633	0	TARGET	sp|Q9NZP8|C1RL_HUMAN Complement C1r subcomponent-like protein OS=Homo sapiens OX=9606 GN=C1RL PE=1 SV=2	0.0000	1.307E-9	45.760	38.928	104
20170803_Serum_Native_Prefraction_Run1_F10	27149	14518	20170803_Serum_Native_Prefraction_Run1_F10.20083.20083.4	82.358	4935.1586	4	1234.7969	1	GVAHNNLMAMAQETGDNLYWGSVTGSQSNAVSPTPAPR	38	N5(115.0269);N6(115.0269);M10(147.0354);N29(115.0269)	GVAHN(115.0269)N(115.0269)LMAM(147.0354)AQETGDNLYWGSVTGSQSN(115.0269)AVSPTPAPR	3946.7737	988.3850	250428.5969	0	TARGET	sp|P0C0L5|CO4B_HUMAN Complement C4-B OS=Homo sapiens OX=9606 GN=C4B PE=1 SV=2	0.0000	1.207E-3	28.018	27.977	222
20170803_Serum_Native_Prefraction_Run1_F10	28377	15373	20170803_Serum_Native_Prefraction_Run1_F10.21015.21015.3	84.953	3105.3901	3	1036.1373	1	TFVLSALQPSPTHSSSNTQR	20	N17(115.0269)	TFVLSALQPSPTHSSSN(115.0269)TQR	2158.0652	947.3249	438969.5455	0	TARGET	sp|P19827|ITIH1_HUMAN Inter-alpha-trypsin inhibitor heavy chain H1 OS=Homo sapiens OX=9606 GN=ITIH1 PE=1 SV=3	0.0000	7.48E-7	39.395	39.335	76
20170803_Serum_Native_Prefraction_Run1_F10	31488	17195	20170803_Serum_Native_Prefraction_Run1_F10.23049.23049.3	91.561	4518.0224	3	1507.0147	1	RPCFSALEVDETYVPKEFNAETFTFHADICTLSEK	35	C3(160.0307);N19(115.0269);C30(160.0307)	RPC(160.0307)FSALEVDETYVPKEFN(115.0269)AETFTFHADIC(160.0307)TLSEK	4151.9136	366.1088	88178.3282	1	TARGET	sp|P02768|ALBU_HUMAN Serum albumin OS=Homo sapiens OX=9606 GN=ALB PE=1 SV=2	0.0000	5.125E-5	32.527	32.444	136
20170803_Serum_Native_Prefraction_Run1_F10	31657	17309	20170803_Serum_Native_Prefraction_Run1_F10.23174.23174.3	91.919	4518.0254	3	1507.0157	1	RPCFSALEVDETYVPKEFNAETFTFHADICTLSEK	35	C3(160.0307);N19(115.0269);C30(160.0307)	RPC(160.0307)FSALEVDETYVPKEFN(115.0269)AETFTFHADIC(160.0307)TLSEK	4151.9136	366.1118	88179.0507	1	TARGET	sp|P02768|ALBU_HUMAN Serum albumin OS=Homo sapiens OX=9606 GN=ALB PE=1 SV=2	0.0000	1.465E-6	35.500	35.343	136
20170803_Serum_Native_Prefraction_Run1_F2	19043	11757	20170803_Serum_Native_Prefraction_Run1_F2.16448.16448.4	64.455	4907.1704	4	1227.7999	1	HYTNPSQDVTVPCPVPSTPPTPSPSTPPTPSPSCCHPR	38	C34(160.0307);C35(160.0307);C13(160.0307)	HYTNPSQDVTVPC(160.0307)PVPSTPPTPSPSTPPTPSPSC(160.0307)C(160.0307)HPR	4135.8828	771.2875	186486.7883	0	TARGET	sp|P01876|IGHA1_HUMAN Immunoglobulin heavy constant alpha 1 OS=Homo sapiens OX=9606 GN=IGHA1 PE=1 SV=2	0.0000	8.718E-6	34.202	31.580	222
20170803_Serum_Native_Prefraction_Run1_F2	19104	11782	20170803_Serum_Native_Prefraction_Run1_F2.16477.16477.4	64.585	4866.1425	4	1217.5429	1	HYTNPSQDVTVPCPVPSTPPTPSPSTPPTPSPSCCHPR	38	C34(160.0307);C35(160.0307);C13(160.0307)	HYTNPSQDVTVPC(160.0307)PVPSTPPTPSPSTPPTPSPSC(160.0307)C(160.0307)HPR	4135.8828	730.2597	176566.8263	0	TARGET	sp|P01876|IGHA1_HUMAN Immunoglobulin heavy constant alpha 1 OS=Homo sapiens OX=9606 GN=IGHA1 PE=1 SV=2	0.0000	2.788E-5	34.620	29.345	222
20170803_Serum_Native_Prefraction_Run1_F2	19373	11937	20170803_Serum_Native_Prefraction_Run1_F2.16653.16653.4	65.160	4907.1552	4	1227.7961	1	HYTNPSQDVTVPCPVPSTPPTPSPSTPPTPSPSCCHPR	38	C34(160.0307);C35(160.0307);C13(160.0307)	HYTNPSQDVTVPC(160.0307)PVPSTPPTPSPSTPPTPSPSC(160.0307)C(160.0307)HPR	4135.8828	771.2724	186483.1373	0	TARGET	sp|P01876|IGHA1_HUMAN Immunoglobulin heavy constant alpha 1 OS=Homo sapiens OX=9606 GN=IGHA1 PE=1 SV=2	0.0000	9.977E-5	32.293	27.189	222
20170803_Serum_Native_Prefraction_Run1_F2	19396	11952	20170803_Serum_Native_Prefraction_Run1_F2.16669.16669.5	65.207	4704.0829	5	941.8239	1	HYTNPSQDVTVPCPVPSTPPTPSPSTPPTPSPSCCHPR	38	C34(160.0307);C35(160.0307);C13(160.0307)	HYTNPSQDVTVPC(160.0307)PVPSTPPTPSPSTPPTPSPSC(160.0307)C(160.0307)HPR	4135.8828	568.2001	137383.0274	0	TARGET	sp|P01876|IGHA1_HUMAN Immunoglobulin heavy constant alpha 1 OS=Homo sapiens OX=9606 GN=IGHA1 PE=1 SV=2	0.0000	1.071E-5	32.400	27.438	296
20170803_Serum_Native_Prefraction_Run1_F2	19437	11974	20170803_Serum_Native_Prefraction_Run1_F2.16694.16694.4	65.295	4866.1601	4	1217.5473	1	HYTNPSQDVTVPCPVPSTPPTPSPSTPPTPSPSCCHPR	38	C34(160.0307);C35(160.0307);C13(160.0307)	HYTNPSQDVTVPC(160.0307)PVPSTPPTPSPSTPPTPSPSC(160.0307)C(160.0307)HPR	4135.8828	730.2773	176571.0818	0	TARGET	sp|P01876|IGHA1_HUMAN Immunoglobulin heavy constant alpha 1 OS=Homo sapiens OX=9606 GN=IGHA1 PE=1 SV=2	0.0000	1.35E-6	38.542	33.443	222
20170803_Serum_Native_Prefraction_Run1_F2	19503	12007	20170803_Serum_Native_Prefraction_Run1_F2.16731.16731.4	65.434	4704.1127	4	1177.0355	1	HYTNPSQDVTVPCPVPSTPPTPSPSTPPTPSPSCCHPR	38	C34(160.0307);C35(160.0307);C13(160.0307)	HYTNPSQDVTVPC(160.0307)PVPSTPPTPSPSTPPTPSPSC(160.0307)C(160.0307)HPR	4135.8828	568.2299	137390.2326	0	TARGET	sp|P01876|IGHA1_HUMAN Immunoglobulin heavy constant alpha 1 OS=Homo sapiens OX=9606 GN=IGHA1 PE=1 SV=2	0.0000	4.941E-3	27.443	21.214	222
20170803_Serum_Native_Prefraction_Run1_F2	19575	12046	20170803_Serum_Native_Prefraction_Run1_F2.16774.16774.5	65.586	4502.0195	5	901.4112	1	HYTNPSQDVTVPCPVPSTPPTPSPSTPPTPSPSCCHPR	38	C34(160.0307);C35(160.0307);C13(160.0307)	HYTNPSQDVTVPC(160.0307)PVPSTPPTPSPSTPPTPSPSC(160.0307)C(160.0307)HPR	4135.8828	366.1367	88526.8557	0	TARGET	sp|P01876|IGHA1_HUMAN Immunoglobulin heavy constant alpha 1 OS=Homo sapiens OX=9606 GN=IGHA1 PE=1 SV=2	0.0000	7.382E-4	21.789	21.632	296
20170803_Serum_Native_Prefraction_Run1_F2	19677	12102	20170803_Serum_Native_Prefraction_Run1_F2.16837.16837.4	65.802	4501.0151	4	1126.2611	1	HYTNPSQDVTVPCPVPSTPPTPSPSTPPTPSPSCCHPR	38	C34(160.0307);C35(160.0307);C13(160.0307)	HYTNPSQDVTVPC(160.0307)PVPSTPPTPSPSTPPTPSPSC(160.0307)C(160.0307)HPR	4135.8828	365.1323	88284.0055	0	TARGET	sp|P01876|IGHA1_HUMAN Immunoglobulin heavy constant alpha 1 OS=Homo sapiens OX=9606 GN=IGHA1 PE=1 SV=2	0.0000	4.622E-8	43.450	43.296	222
20170803_Serum_Native_Prefraction_Run1_F2	19679	12104	20170803_Serum_Native_Prefraction_Run1_F2.16839.16839.4	65.805	4704.0976	4	1177.0317	1	HYTNPSQDVTVPCPVPSTPPTPSPSTPPTPSPSCCHPR	38	C34(160.0307);C35(160.0307);C13(160.0307)	HYTNPSQDVTVPC(160.0307)PVPSTPPTPSPSTPPTPSPSC(160.0307)C(160.0307)HPR	4135.8828	568.2148	137386.5817	0	TARGET	sp|P01876|IGHA1_HUMAN Immunoglobulin heavy constant alpha 1 OS=Homo sapiens OX=9606 GN=IGHA1 PE=1 SV=2	0.0000	2.211E-3	29.883	23.233	222
20170803_Serum_Native_Prefraction_Run1_F2	19739	12145	20170803_Serum_Native_Prefraction_Run1_F2.16886.16886.5	65.936	4501.0082	5	901.2089	1	HYTNPSQDVTVPCPVPSTPPTPSPSTPPTPSPSCCHPR	38	C34(160.0307);C35(160.0307);C13(160.0307)	HYTNPSQDVTVPC(160.0307)PVPSTPPTPSPSTPPTPSPSC(160.0307)C(160.0307)HPR	4135.8828	365.1254	88282.3372	0	TARGET	sp|P01876|IGHA1_HUMAN Immunoglobulin heavy constant alpha 1 OS=Homo sapiens OX=9606 GN=IGHA1 PE=1 SV=2	0.0000	4.07E-9	41.768	35.072	296
20170803_Serum_Native_Prefraction_Run1_F2	19834	12207	20170803_Serum_Native_Prefraction_Run1_F2.16957.16957.4	66.144	4501.0141	4	1126.2608	1	HYTNPSQDVTVPCPVPSTPPTPSPSTPPTPSPSCCHPR	38	C34(160.0307);C35(160.0307);C13(160.0307)	HYTNPSQDVTVPC(160.0307)PVPSTPPTPSPSTPPTPSPSC(160.0307)C(160.0307)HPR	4135.8828	365.1313	88283.7637	0	TARGET	sp|P01876|IGHA1_HUMAN Immunoglobulin heavy constant alpha 1 OS=Homo sapiens OX=9606 GN=IGHA1 PE=1 SV=2	0.0000	5.786E-11	48.203	45.447	222
20170803_Serum_Native_Prefraction_Run1_F2	20009	12319	20170803_Serum_Native_Prefraction_Run1_F2.17080.17080.4	66.510	4501.0112	4	1126.2601	1	HYTNPSQDVTVPCPVPSTPPTPSPSTPPTPSPSCCHPR	38	C34(160.0307);C35(160.0307);C13(160.0307)	HYTNPSQDVTVPC(160.0307)PVPSTPPTPSPSTPPTPSPSC(160.0307)C(160.0307)HPR	4135.8828	365.1284	88283.0626	0	TARGET	sp|P01876|IGHA1_HUMAN Immunoglobulin heavy constant alpha 1 OS=Homo sapiens OX=9606 GN=IGHA1 PE=1 SV=2	0.0000	3.542E-7	38.847	34.021	222
20170803_Serum_Native_Prefraction_Run1_F2	20120	12390	20170803_Serum_Native_Prefraction_Run1_F2.17158.17158.4	66.744	4338.9653	4	1085.7486	1	HYTNPSQDVTVPCPVPSTPPTPSPSTPPTPSPSCCHPR	38	C34(160.0307);C35(160.0307);C13(160.0307)	HYTNPSQDVTVPC(160.0307)PVPSTPPTPSPSTPPTPSPSC(160.0307)C(160.0307)HPR	4135.8828	203.0825	49102.5761	0	TARGET	sp|P01876|IGHA1_HUMAN Immunoglobulin heavy constant alpha 1 OS=Homo sapiens OX=9606 GN=IGHA1 PE=1 SV=2	0.0000	3.914E-11	48.418	45.757	222
20170803_Serum_Native_Prefraction_Run1_F2	20137	12401	20170803_Serum_Native_Prefraction_Run1_F2.17170.17170.5	66.780	4501.0170	5	901.2107	1	HYTNPSQDVTVPCPVPSTPPTPSPSTPPTPSPSCCHPR	38	C34(160.0307);C35(160.0307);C13(160.0307)	HYTNPSQDVTVPC(160.0307)PVPSTPPTPSPSTPPTPSPSC(160.0307)C(160.0307)HPR	4135.8828	365.1342	88284.4649	0	TARGET	sp|P01876|IGHA1_HUMAN Immunoglobulin heavy constant alpha 1 OS=Homo sapiens OX=9606 GN=IGHA1 PE=1 SV=2	0.0000	1.62E-10	49.121	44.046	296
20170803_Serum_Native_Prefraction_Run1_F2	20184	12438	20170803_Serum_Native_Prefraction_Run1_F2.17210.17210.4	66.878	4501.0146	4	1126.2609	1	HYTNPSQDVTVPCPVPSTPPTPSPSTPPTPSPSCCHPR	38	C34(160.0307);C35(160.0307);C13(160.0307)	HYTNPSQDVTVPC(160.0307)PVPSTPPTPSPSTPPTPSPSC(160.0307)C(160.0307)HPR	4135.8828	365.1318	88283.8846	0	TARGET	sp|P01876|IGHA1_HUMAN Immunoglobulin heavy constant alpha 1 OS=Homo sapiens OX=9606 GN=IGHA1 PE=1 SV=2	0.0000	2.495E-8	41.180	38.687	222
20170803_Serum_Native_Prefraction_Run1_F2	20296	12495	20170803_Serum_Native_Prefraction_Run1_F2.17274.17274.4	67.114	4338.9643	4	1085.7484	1	HYTNPSQDVTVPCPVPSTPPTPSPSTPPTPSPSCCHPR	38	C34(160.0307);C35(160.0307);C13(160.0307)	HYTNPSQDVTVPC(160.0307)PVPSTPPTPSPSTPPTPSPSC(160.0307)C(160.0307)HPR	4135.8828	203.0815	49102.3343	0	TARGET	sp|P01876|IGHA1_HUMAN Immunoglobulin heavy constant alpha 1 OS=Homo sapiens OX=9606 GN=IGHA1 PE=1 SV=2	0.0000	4.019E-6	36.617	34.106	222
20170803_Serum_Native_Prefraction_Run1_F2	20329	12519	20170803_Serum_Native_Prefraction_Run1_F2.17300.17300.3	67.183	2380.1941	3	794.4053	1	TVVQPSVGAAAGPVVPPCPGR	21	C18(160.0307)	TVVQPSVGAAAGPVVPPC(160.0307)PGR	2015.0621	365.1319	181201.3138	0	TARGET	sp|P02765|FETUA_HUMAN Alpha-2-HS-glycoprotein OS=Homo sapiens OX=9606 GN=AHSG PE=1 SV=1	0.0000	1.931E-7	34.790	26.954	80
20170803_Serum_Native_Prefraction_Run1_F2	20347	12531	20170803_Serum_Native_Prefraction_Run1_F2.17313.17313.5	67.220	4338.9604	5	868.7994	1	HYTNPSQDVTVPCPVPSTPPTPSPSTPPTPSPSCCHPR	38	C34(160.0307);C35(160.0307);C13(160.0307)	HYTNPSQDVTVPC(160.0307)PVPSTPPTPSPSTPPTPSPSC(160.0307)C(160.0307)HPR	4135.8828	203.0776	49101.3914	0	TARGET	sp|P01876|IGHA1_HUMAN Immunoglobulin heavy constant alpha 1 OS=Homo sapiens OX=9606 GN=IGHA1 PE=1 SV=2	0.0000	3.569E-3	22.271	20.299	296
20170803_Serum_Native_Prefraction_Run1_F2	20472	12604	20170803_Serum_Native_Prefraction_Run1_F2.17394.17394.4	67.482	4338.9672	4	1085.7491	1	HYTNPSQDVTVPCPVPSTPPTPSPSTPPTPSPSCCHPR	38	C34(160.0307);C35(160.0307);C13(160.0307)	HYTNPSQDVTVPC(160.0307)PVPSTPPTPSPSTPPTPSPSC(160.0307)C(160.0307)HPR	4135.8828	203.0844	49103.0355	0	TARGET	sp|P01876|IGHA1_HUMAN Immunoglobulin heavy constant alpha 1 OS=Homo sapiens OX=9606 GN=IGHA1 PE=1 SV=2	0.0000	1.48E-11	48.639	45.944	222
20170803_Serum_Native_Prefraction_Run1_F2	20491	12621	20170803_Serum_Native_Prefraction_Run1_F2.17412.17412.3	67.521	4338.9702	3	1447.3307	1	HYTNPSQDVTVPCPVPSTPPTPSPSTPPTPSPSCCHPR	38	C34(160.0307);C35(160.0307);C13(160.0307)	HYTNPSQDVTVPC(160.0307)PVPSTPPTPSPSTPPTPSPSC(160.0307)C(160.0307)HPR	4135.8828	203.0874	49103.7609	0	TARGET	sp|P01876|IGHA1_HUMAN Immunoglobulin heavy constant alpha 1 OS=Homo sapiens OX=9606 GN=IGHA1 PE=1 SV=2	0.0000	1.81E-4	28.581	22.673	148
20170803_Serum_Native_Prefraction_Run1_F2	20505	12633	20170803_Serum_Native_Prefraction_Run1_F2.17425.17425.3	67.551	2380.1933	3	794.4050	1	TVVQPSVGAAAGPVVPPCPGR	21	C18(160.0307)	TVVQPSVGAAAGPVVPPC(160.0307)PGR	2015.0621	365.1312	181200.9665	0	TARGET	sp|P02765|FETUA_HUMAN Alpha-2-HS-glycoprotein OS=Homo sapiens OX=9606 GN=AHSG PE=1 SV=1	0.0000	5.318E-4	22.560	19.319	80
20170803_Serum_Native_Prefraction_Run1_F2	20792	12842	20170803_Serum_Native_Prefraction_Run1_F2.17652.17652.4	68.152	4792.1054	4	1199.0336	1	HYTNPSQDVTVPCPVPSTPPTPSPSTPPTPSPSCCHPR	38	C34(160.0307);C35(160.0307);C13(160.0307)	HYTNPSQDVTVPC(160.0307)PVPSTPPTPSPSTPPTPSPSC(160.0307)C(160.0307)HPR	4135.8828	656.2226	158665.6663	0	TARGET	sp|P01876|IGHA1_HUMAN Immunoglobulin heavy constant alpha 1 OS=Homo sapiens OX=9606 GN=IGHA1 PE=1 SV=2	0.0000	8.906E-5	29.881	25.311	222
20170803_Serum_Native_Prefraction_Run1_F2	21416	13318	20170803_Serum_Native_Prefraction_Run1_F2.18174.18174.3	69.479	2671.2866	3	891.4361	1	TVVQPSVGAAAGPVVPPCPGR	21	C18(160.0307)	TVVQPSVGAAAGPVVPPC(160.0307)PGR	2015.0621	656.2244	325659.6410	0	TARGET	sp|P02765|FETUA_HUMAN Alpha-2-HS-glycoprotein OS=Homo sapiens OX=9606 GN=AHSG PE=1 SV=1	0.0000	7.089E-3	20.958	16.540	80
20170803_Serum_Native_Prefraction_Run1_F2	26410	16823	20170803_Serum_Native_Prefraction_Run1_F2.22019.22019.3	80.030	3167.4301	3	1056.8173	1	IASFSQNCDIYPGKDFVQPPTK	22	C8(160.0307)	IASFSQNC(160.0307)DIYPGKDFVQPPTK	2511.2102	656.2199	261316.1973	1	TARGET	sp|P01042|KNG1_HUMAN Kininogen-1 OS=Homo sapiens OX=9606 GN=KNG1 PE=1 SV=2	0.0000	1.61E-4	30.452	24.829	84
20170803_Serum_Native_Prefraction_Run1_F2	27048	17177	20170803_Serum_Native_Prefraction_Run1_F2.22413.22413.3	81.377	2814.2946	3	939.1055	1	TFVLSALQPSPTHSSSNTQR	20	N17(115.0269)	TFVLSALQPSPTHSSSN(115.0269)TQR	2158.0652	656.2295	304082.3326	0	TARGET	sp|P19827|ITIH1_HUMAN Inter-alpha-trypsin inhibitor heavy chain H1 OS=Homo sapiens OX=9606 GN=ITIH1 PE=1 SV=3	0.0000	4.559E-6	37.457	37.230	76
20170803_Serum_Native_Prefraction_Run1_F2	27913	17785	20170803_Serum_Native_Prefraction_Run1_F2.23084.23084.3	83.225	3104.4072	3	1035.8097	1	TFVLSALQPSPTHSSSNTQR	20		TFVLSALQPSPTHSSSNTQR	2157.0813	947.3259	439170.2343	0	TARGET	sp|P19827|ITIH1_HUMAN Inter-alpha-trypsin inhibitor heavy chain H1 OS=Homo sapiens OX=9606 GN=ITIH1 PE=1 SV=3	0.0000	2.133E-6	34.223	29.836	76
20170803_Serum_Native_Prefraction_Run1_F2	27945	17809	20170803_Serum_Native_Prefraction_Run1_F2.23110.23110.2	83.292	3104.4028	2	1553.2087	1	TFVLSALQPSPTHSSSNTQR	20		TFVLSALQPSPTHSSSNTQR	2157.0813	947.3215	439168.1945	0	TARGET	sp|P19827|ITIH1_HUMAN Inter-alpha-trypsin inhibitor heavy chain H1 OS=Homo sapiens OX=9606 GN=ITIH1 PE=1 SV=3	0.0000	3.913E-3	21.675	19.603	38
20170803_Serum_Native_Prefraction_Run1_F2	27977	17831	20170803_Serum_Native_Prefraction_Run1_F2.23134.23134.4	83.360	3104.4033	4	777.1081	1	TFVLSALQPSPTHSSSNTQR	20		TFVLSALQPSPTHSSSNTQR	2157.0813	947.3220	439168.4263	0	TARGET	sp|P19827|ITIH1_HUMAN Inter-alpha-trypsin inhibitor heavy chain H1 OS=Homo sapiens OX=9606 GN=ITIH1 PE=1 SV=3	0.0000	7.579E-6	33.525	31.611	114
20170803_Serum_Native_Prefraction_Run1_F2	28073	17904	20170803_Serum_Native_Prefraction_Run1_F2.23213.23213.3	83.563	3104.4101	3	1035.8106	1	TFVLSALQPSPTHSSSNTQR	20		TFVLSALQPSPTHSSSNTQR	2157.0813	947.3288	439171.5787	0	TARGET	sp|P19827|ITIH1_HUMAN Inter-alpha-trypsin inhibitor heavy chain H1 OS=Homo sapiens OX=9606 GN=ITIH1 PE=1 SV=3	0.0000	1.677E-5	31.823	29.388	76
20170803_Serum_Native_Prefraction_Run1_F2	28137	17950	20170803_Serum_Native_Prefraction_Run1_F2.23263.23263.4	83.698	3104.4040	4	777.1083	1	TFVLSALQPSPTHSSSNTQR	20		TFVLSALQPSPTHSSSNTQR	2157.0813	947.3227	439168.7508	0	TARGET	sp|P19827|ITIH1_HUMAN Inter-alpha-trypsin inhibitor heavy chain H1 OS=Homo sapiens OX=9606 GN=ITIH1 PE=1 SV=3	0.0000	6.325E-6	33.419	29.049	114
20170803_Serum_Native_Prefraction_Run1_F2	28140	17952	20170803_Serum_Native_Prefraction_Run1_F2.23265.23265.2	83.704	3104.4033	2	1553.2089	1	TFVLSALQPSPTHSSSNTQR	20		TFVLSALQPSPTHSSSNTQR	2157.0813	947.3220	439168.4263	0	TARGET	sp|P19827|ITIH1_HUMAN Inter-alpha-trypsin inhibitor heavy chain H1 OS=Homo sapiens OX=9606 GN=ITIH1 PE=1 SV=3	0.0000	1.062E-4	28.127	28.024	38
20170803_Serum_Native_Prefraction_Run1_F2	28234	18030	20170803_Serum_Native_Prefraction_Run1_F2.23350.23350.3	83.904	3104.3984	3	1035.8067	1	TFVLSALQPSPTHSSSNTQR	20		TFVLSALQPSPTHSSSNTQR	2157.0813	947.3171	439166.1547	0	TARGET	sp|P19827|ITIH1_HUMAN Inter-alpha-trypsin inhibitor heavy chain H1 OS=Homo sapiens OX=9606 GN=ITIH1 PE=1 SV=3	0.0000	2.472E-6	34.477	32.580	76
20170803_Serum_Native_Prefraction_Run1_F2	29665	19186	20170803_Serum_Native_Prefraction_Run1_F2.24601.24601.4	86.939	4125.8754	4	1032.4761	1	FVSVTCDFFESQAPATGSENSAVNQKPTNLPK	32	C6(160.0307)	FVSVTC(160.0307)DFFESQAPATGSENSAVNQKPTNLPK	3469.6460	656.2294	189134.3958	0	TARGET	sp|Q9UGM5|FETUB_HUMAN Fetuin-B OS=Homo sapiens OX=9606 GN=FETUB PE=1 SV=2	0.0000	1.162E-5	31.648	29.422	186
20170803_Serum_Native_Prefraction_Run1_F2	30486	19810	20170803_Serum_Native_Prefraction_Run1_F2.25284.25284.4	88.694	4601.0458	4	1151.2687	1	GVAHNNLMAMAQETGDNLYWGSVTGSQSNAVSPTPAPR	38	M10(147.0354);N17(115.0269)	GVAHNNLMAM(147.0354)AQETGDN(115.0269)LYWGSVTGSQSNAVSPTPAPR	3944.8057	656.2402	166355.5191	0	TARGET	sp|P0C0L5|CO4B_HUMAN Complement C4-B OS=Homo sapiens OX=9606 GN=C4B PE=1 SV=2	0.0000	1.0E-15	58.936	56.343	222
20170803_Serum_Native_Prefraction_Run1_F2	31684	20699	20170803_Serum_Native_Prefraction_Run1_F2.26253.26253.5	91.244	4891.1371	5	979.2347	1	GVAHNNLMAMAQETGDNLYWGSVTGSQSNAVSPTPAPR	38	M10(147.0354)	GVAHNNLMAM(147.0354)AQETGDNLYWGSVTGSQSNAVSPTPAPR	3943.8215	947.3156	240202.4534	0	TARGET	sp|P0C0L5|CO4B_HUMAN Complement C4-B OS=Homo sapiens OX=9606 GN=C4B PE=1 SV=2	0.0000	6.593E-3	49.078	46.601	296
20170803_Serum_Native_Prefraction_Run1_F2	33684	22060	20170803_Serum_Native_Prefraction_Run1_F2.27746.27746.4	95.482	4894.1450	4	1224.5435	1	GVAHNNLMAMAQETGDNLYWGSVTGSQSNAVSPTPAPR	38	M10(147.0354);Q12(129.0426);Q27(129.0426)	GVAHNNLMAM(147.0354)AQ(129.0426)ETGDNLYWGSVTGSQ(129.0426)SNAVSPTPAPR	3945.7896	948.3554	240346.1654	0	TARGET	sp|P0C0L5|CO4B_HUMAN Complement C4-B OS=Homo sapiens OX=9606 GN=C4B PE=1 SV=2	0.0000	4.512E-4	46.638	46.637	222
20170803_Serum_Native_Prefraction_Run1_F2	34884	22847	20170803_Serum_Native_Prefraction_Run1_F2.28621.28621.4	98.058	4586.0512	4	1147.5201	1	GVAHNNLMAMAQETGDNLYWGSVTGSQSNAVSPTPAPR	38	N29(115.0269)	GVAHNNLMAMAQETGDNLYWGSVTGSQSN(115.0269)AVSPTPAPR	3928.8105	657.2407	167287.4525	0	TARGET	sp|P0C0L5|CO4B_HUMAN Complement C4-B OS=Homo sapiens OX=9606 GN=C4B PE=1 SV=2	0.0000	7.279E-12	53.045	50.661	222
20170803_Serum_Native_Prefraction_Run1_F2	35008	22927	20170803_Serum_Native_Prefraction_Run1_F2.28709.28709.4	98.322	4936.1450	4	1235.0435	1	GVAHNNLMAMAQETGDNLYWGSVTGSQSNAVSPTPAPR	38	N5(115.0269);M8(147.0354);M10(147.0354)	GVAHN(115.0269)NLM(147.0354)AM(147.0354)AQETGDNLYWGSVTGSQSNAVSPTPAPR	3960.8005	975.3444	246249.3125	0	TARGET	sp|P0C0L5|CO4B_HUMAN Complement C4-B OS=Homo sapiens OX=9606 GN=C4B PE=1 SV=2	0.0000	3.115E-3	30.707	29.605	222
20170803_Serum_Native_Prefraction_Run1_F2	35059	22965	20170803_Serum_Native_Prefraction_Run1_F2.28750.28750.4	98.429	4891.1298	4	1223.7897	1	GVAHNNLMAMAQETGDNLYWGSVTGSQSNAVSPTPAPR	38	M10(147.0354)	GVAHNNLMAM(147.0354)AQETGDNLYWGSVTGSQSNAVSPTPAPR	3943.8215	947.3083	240200.6024	0	TARGET	sp|P0C0L5|CO4B_HUMAN Complement C4-B OS=Homo sapiens OX=9606 GN=C4B PE=1 SV=2	0.0000	4.992E-10	38.239	38.195	222
20170803_Serum_Native_Prefraction_Run1_F2	35170	23041	20170803_Serum_Native_Prefraction_Run1_F2.28833.28833.4	98.663	4950.1499	4	1238.5448	1	GVAHNNLMAMAQETGDNLYWGSVTGSQSNAVSPTPAPR	38	N5(115.0269);M8(147.0354);M10(147.0354)	GVAHN(115.0269)NLM(147.0354)AM(147.0354)AQETGDNLYWGSVTGSQSNAVSPTPAPR	3960.8005	989.3493	249785.1886	0	TARGET	sp|P0C0L5|CO4B_HUMAN Complement C4-B OS=Homo sapiens OX=9606 GN=C4B PE=1 SV=2	0.0000	1.256E-4	30.444	29.812	222
20170803_Serum_Native_Prefraction_Run1_F2	35343	23154	20170803_Serum_Native_Prefraction_Run1_F2.28957.28957.4	99.030	4950.1518	4	1238.5452	1	GVAHNNLMAMAQETGDNLYWGSVTGSQSNAVSPTPAPR	38	N5(115.0269);M8(147.0354);M10(147.0354)	GVAHN(115.0269)NLM(147.0354)AM(147.0354)AQETGDNLYWGSVTGSQSNAVSPTPAPR	3960.8005	989.3513	249785.6936	0	TARGET	sp|P0C0L5|CO4B_HUMAN Complement C4-B OS=Homo sapiens OX=9606 GN=C4B PE=1 SV=2	0.0000	1.44E-6	36.860	35.611	222
20170803_Serum_Native_Prefraction_Run1_F2	36303	23766	20170803_Serum_Native_Prefraction_Run1_F2.29631.29631.3	101.063	4875.1362	3	1626.0527	1	GVAHNNLMAMAQETGDNLYWGSVTGSQSNAVSPTPAPR	38		GVAHNNLMAMAQETGDNLYWGSVTGSQSNAVSPTPAPR	3927.8267	947.3095	241179.0469	0	TARGET	sp|P0C0L5|CO4B_HUMAN Complement C4-B OS=Homo sapiens OX=9606 GN=C4B PE=1 SV=2	0.0000	6.892E-3	31.085	31.085	148
20170803_Serum_Native_Prefraction_Run1_F3	21010	13486	20170803_Serum_Native_Prefraction_Run1_F3.17955.17955.3	67.105	2380.1916	3	794.4045	1	TVVQPSVGAAAGPVVPPCPGR	21	C18(160.0307)	TVVQPSVGAAAGPVVPPC(160.0307)PGR	2015.0621	365.1295	181200.1228	0	TARGET	sp|P02765|FETUA_HUMAN Alpha-2-HS-glycoprotein OS=Homo sapiens OX=9606 GN=AHSG PE=1 SV=1	0.0000	3.113E-9	35.177	27.858	80
20170803_Serum_Native_Prefraction_Run1_F3	22088	14334	20170803_Serum_Native_Prefraction_Run1_F3.18893.18893.2	69.405	2672.2986	2	1337.1566	1	TVVQPSVGAAAGPVVPPCPGR	21	C18(160.0307)	TVVQPSVGAAAGPVVPPC(160.0307)PGR	2015.0621	657.2364	326161.8587	0	TARGET	sp|P02765|FETUA_HUMAN Alpha-2-HS-glycoprotein OS=Homo sapiens OX=9606 GN=AHSG PE=1 SV=1	0.0000	5.938E-3	19.572	18.342	40
20170803_Serum_Native_Prefraction_Run1_F3	26947	18080	20170803_Serum_Native_Prefraction_Run1_F3.22970.22970.5	79.673	4392.9213	5	879.5915	1	DHSHGPPLPQGPPPLLPMSCSSCQHATFGTNGAQR	35	C20(160.0307);C23(160.0307);N31(115.0269)	DHSHGPPLPQGPPPLLPMSC(160.0307)SSC(160.0307)QHATFGTN(115.0269)GAQR	3736.6931	656.2282	175617.3661	0	TARGET	sp|P04196|HRG_HUMAN Histidine-rich glycoprotein OS=Homo sapiens OX=9606 GN=HRG PE=1 SV=1	0.0000	9.784E-4	27.569	27.562	272
20170803_Serum_Native_Prefraction_Run1_F3	27597	18529	20170803_Serum_Native_Prefraction_Run1_F3.23460.23460.4	81.040	4932.1728	4	1234.0505	1	GVAHNNLMAMAQETGDNLYWGSVTGSQSNAVSPTPAPR	38	M10(147.0354)	GVAHNNLMAM(147.0354)AQETGDNLYWGSVTGSQSNAVSPTPAPR	3943.8215	988.3513	250607.5135	0	TARGET	sp|P0C0L5|CO4B_HUMAN Complement C4-B OS=Homo sapiens OX=9606 GN=C4B PE=1 SV=2	0.0000	2.614E-6	33.398	33.398	222
20170803_Serum_Native_Prefraction_Run1_F3	32212	22091	20170803_Serum_Native_Prefraction_Run1_F3.27342.27342.3	90.844	4891.1396	3	1631.3871	1	GVAHNNLMAMAQETGDNLYWGSVTGSQSNAVSPTPAPR	38	M10(147.0354)	GVAHNNLMAM(147.0354)AQETGDNLYWGSVTGSQSNAVSPTPAPR	3943.8215	947.3181	240203.0873	0	TARGET	sp|P0C0L5|CO4B_HUMAN Complement C4-B OS=Homo sapiens OX=9606 GN=C4B PE=1 SV=2	0.0000	2.783E-3	28.703	28.578	148
20170803_Serum_Native_Prefraction_Run1_F3	40864	28208	20170803_Serum_Native_Prefraction_Run1_F3.34094.34094.4	109.391	4935.1713	4	1234.8001	1	GVAHNNLMAMAQETGDNLYWGSVTGSQSNAVSPTPAPR	38	M8(147.0354);M10(147.0354)	GVAHNNLM(147.0354)AM(147.0354)AQETGDNLYWGSVTGSQSNAVSPTPAPR	3959.8164	975.3549	246313.1624	0	TARGET	sp|P0C0L5|CO4B_HUMAN Complement C4-B OS=Homo sapiens OX=9606 GN=C4B PE=1 SV=2	0.0000	7.302E-6	34.639	34.342	222
20170803_Serum_Native_Prefraction_Run1_F3	42334	29114	20170803_Serum_Native_Prefraction_Run1_F3.35105.35105.3	112.543	3739.6943	3	1247.5720	1	ADIGCTPGSGKDYAGVFSDAGLTFTSSSGQQTAQR	35	C5(160.0307)	ADIGC(160.0307)TPGSGKDYAGVFSDAGLTFTSSSGQQTAQR	3536.6113	203.0830	57423.0479	1	TARGET	sp|P01024|CO3_HUMAN Complement C3 OS=Homo sapiens OX=9606 GN=C3 PE=1 SV=2	0.0000	2.876E-4	31.100	21.958	136
20170803_Serum_Native_Prefraction_Run1_F4	6224	3619	20170803_Serum_Native_Prefraction_Run1_F4.5922.5922.4	32.080	2182.0261	4	546.5138	1	SSTTKPPFKPHGSR	14		SSTTKPPFKPHGSR	1525.8000	656.2260	430086.5120	0	TARGET	sp|P04196|HRG_HUMAN Histidine-rich glycoprotein OS=Homo sapiens OX=9606 GN=HRG PE=1 SV=1	0.0000	4.793E-3	27.616	20.538	78
20170803_Serum_Native_Prefraction_Run1_F4	19201	13385	20170803_Serum_Native_Prefraction_Run1_F4.16517.16517.2	59.482	2631.1050	2	1316.5598	1	SPDESTPELSAEPTPK	16		SPDESTPELSAEPTPK	1683.7838	947.3211	562614.4520	0	TARGET	sp|Q92954|PRG4_HUMAN Proteoglycan 4 OS=Homo sapiens OX=9606 GN=PRG4 PE=1 SV=3	0.0000	2.218E-7	35.389	27.094	30
20170803_Serum_Native_Prefraction_Run1_F4	20716	14419	20170803_Serum_Native_Prefraction_Run1_F4.17648.17648.3	62.681	3269.3256	3	1090.7825	1	EHEGAIYPDNTTDFQRADDK	20	N10(115.0269)	EHEGAIYPDN(115.0269)TTDFQRADDK	2322.0034	947.3222	407976.2329	1	TARGET	sp|P00450|CERU_HUMAN Ceruloplasmin OS=Homo sapiens OX=9606 GN=CP PE=1 SV=1	0.0000	9.881E-6	32.008	27.244	76
20170803_Serum_Native_Prefraction_Run1_F4	20725	14420	20170803_Serum_Native_Prefraction_Run1_F4.17650.17650.4	62.701	3269.3251	4	818.3386	1	EHEGAIYPDNTTDFQRADDK	20	N10(115.0269)	EHEGAIYPDN(115.0269)TTDFQRADDK	2322.0034	947.3217	407976.0176	1	TARGET	sp|P00450|CERU_HUMAN Ceruloplasmin OS=Homo sapiens OX=9606 GN=CP PE=1 SV=1	0.0000	2.136E-3	26.332	22.399	114
20170803_Serum_Native_Prefraction_Run1_F4	28728	19987	20170803_Serum_Native_Prefraction_Run1_F4.23767.23767.4	79.647	2813.2956	4	704.3312	1	TFVLSALQPSPTHSSSNTQR	20		TFVLSALQPSPTHSSSNTQR	2157.0813	656.2143	304213.9858	0	TARGET	sp|P19827|ITIH1_HUMAN Inter-alpha-trypsin inhibitor heavy chain H1 OS=Homo sapiens OX=9606 GN=ITIH1 PE=1 SV=3	0.0000	8.545E-6	35.380	29.967	114
20170803_Serum_Native_Prefraction_Run1_F4	28824	20071	20170803_Serum_Native_Prefraction_Run1_F4.23857.23857.2	79.847	2813.3093	2	1407.6619	1	TFVLSALQPSPTHSSSNTQR	20		TFVLSALQPSPTHSSSNTQR	2157.0813	656.2280	304220.3370	0	TARGET	sp|P19827|ITIH1_HUMAN Inter-alpha-trypsin inhibitor heavy chain H1 OS=Homo sapiens OX=9606 GN=ITIH1 PE=1 SV=3	0.0000	1.582E-4	31.655	29.589	38
20170803_Serum_Native_Prefraction_Run1_F4	28840	20080	20170803_Serum_Native_Prefraction_Run1_F4.23867.23867.3	79.880	2813.3066	3	938.7761	1	TFVLSALQPSPTHSSSNTQR	20		TFVLSALQPSPTHSSSNTQR	2157.0813	656.2253	304219.0853	0	TARGET	sp|P19827|ITIH1_HUMAN Inter-alpha-trypsin inhibitor heavy chain H1 OS=Homo sapiens OX=9606 GN=ITIH1 PE=1 SV=3	0.0000	2.076E-6	34.616	30.328	76
20170803_Serum_Native_Prefraction_Run1_F4	29016	20165	20170803_Serum_Native_Prefraction_Run1_F4.23963.23963.3	80.249	2813.3086	3	938.7768	1	TFVLSALQPSPTHSSSNTQR	20		TFVLSALQPSPTHSSSNTQR	2157.0813	656.2273	304220.0125	0	TARGET	sp|P19827|ITIH1_HUMAN Inter-alpha-trypsin inhibitor heavy chain H1 OS=Homo sapiens OX=9606 GN=ITIH1 PE=1 SV=3	0.0000	9.812E-7	34.801	30.440	76
20170803_Serum_Native_Prefraction_Run1_F4	34052	23791	20170803_Serum_Native_Prefraction_Run1_F4.27940.27940.4	90.944	4892.1391	4	1224.0421	1	GVAHNNLMAMAQETGDNLYWGSVTGSQSNAVSPTPAPR	38	M10(147.0354);N17(115.0269)	GVAHNNLMAM(147.0354)AQETGDN(115.0269)LYWGSVTGSQSNAVSPTPAPR	3944.8057	947.3334	240147.0369	0	TARGET	sp|P0C0L5|CO4B_HUMAN Complement C4-B OS=Homo sapiens OX=9606 GN=C4B PE=1 SV=2	0.0000	5.308E-4	42.314	39.866	222
20170803_Serum_Native_Prefraction_Run1_F4	38641	27147	20170803_Serum_Native_Prefraction_Run1_F4.31596.31596.5	100.668	4877.1542	5	976.4381	1	GVAHNNLMAMAQETGDNLYWGSVTGSQSNAVSPTPAPR	38	N17(115.0269)	GVAHNNLMAMAQETGDN(115.0269)LYWGSVTGSQSNAVSPTPAPR	3928.8105	948.3437	241381.8890	0	TARGET	sp|P0C0L5|CO4B_HUMAN Complement C4-B OS=Homo sapiens OX=9606 GN=C4B PE=1 SV=2	0.0000	5.897E-4	52.240	49.730	296
20170803_Serum_Native_Prefraction_Run1_F4	38687	27186	20170803_Serum_Native_Prefraction_Run1_F4.31638.31638.6	100.765	4877.1518	6	813.8659	1	GVAHNNLMAMAQETGDNLYWGSVTGSQSNAVSPTPAPR	38	Q27(129.0426)	GVAHNNLMAMAQETGDNLYWGSVTGSQ(129.0426)SNAVSPTPAPR	3928.8105	948.3412	241381.2527	0	TARGET	sp|P0C0L5|CO4B_HUMAN Complement C4-B OS=Homo sapiens OX=9606 GN=C4B PE=1 SV=2	0.0000	9.288E-3	39.616	39.594	370
20170803_Serum_Native_Prefraction_Run1_F4	38705	27203	20170803_Serum_Native_Prefraction_Run1_F4.31656.31656.4	100.802	4875.1518	4	1219.7952	1	GVAHNNLMAMAQETGDNLYWGSVTGSQSNAVSPTPAPR	38		GVAHNNLMAMAQETGDNLYWGSVTGSQSNAVSPTPAPR	3927.8267	947.3251	241183.0186	0	TARGET	sp|P0C0L5|CO4B_HUMAN Complement C4-B OS=Homo sapiens OX=9606 GN=C4B PE=1 SV=2	0.0000	6.042E-9	52.908	52.907	222
20170803_Serum_Native_Prefraction_Run1_F4	38720	27215	20170803_Serum_Native_Prefraction_Run1_F4.31669.31669.3	100.834	4875.1421	3	1626.0546	1	GVAHNNLMAMAQETGDNLYWGSVTGSQSNAVSPTPAPR	38		GVAHNNLMAMAQETGDNLYWGSVTGSQSNAVSPTPAPR	3927.8267	947.3154	241180.5490	0	TARGET	sp|P0C0L5|CO4B_HUMAN Complement C4-B OS=Homo sapiens OX=9606 GN=C4B PE=1 SV=2	0.0000	2.208E-3	32.785	30.643	148
20170803_Serum_Native_Prefraction_Run1_F5	7878	4976	20170803_Serum_Native_Prefraction_Run1_F5.7398.7398.3	35.487	2160.9306	3	721.3175	1	KVNCTTQPCPTAK	13	N3(115.0269);C4(160.0307);C9(160.0307)	KVN(115.0269)C(160.0307)TTQPC(160.0307)PTAK	1504.7014	656.2292	436119.2194	1	TARGET	sp|P04275|VWF_HUMAN von Willebrand factor OS=Homo sapiens OX=9606 GN=VWF PE=1 SV=4	0.0000	5.503E-3	27.896	22.111	48
20170803_Serum_Native_Prefraction_Run1_F5	15872	11709	20170803_Serum_Native_Prefraction_Run1_F5.14652.14652.3	52.277	2605.1406	3	869.3875	1	DANISQPETTKEGLR	15		DANISQPETTKEGLR	1657.8270	947.3136	571418.8513	1	TARGET	sp|Q13790|APOF_HUMAN Apolipoprotein F OS=Homo sapiens OX=9606 GN=APOF PE=1 SV=2	0.0000	5.806E-4	33.516	23.253	56
20170803_Serum_Native_Prefraction_Run1_F5	19069	14179	20170803_Serum_Native_Prefraction_Run1_F5.17322.17322.3	58.988	2892.2099	3	965.0772	1	DGSPDVTTADIGANTPDATK	20		DGSPDVTTADIGANTPDATK	1944.8911	947.3188	487080.6391	0	TARGET	sp|Q96PD5|PGRP2_HUMAN N-acetylmuramoyl-L-alanine amidase OS=Homo sapiens OX=9606 GN=PGLYRP2 PE=1 SV=1	0.0000	9.88E-8	41.283	33.295	76
20170803_Serum_Native_Prefraction_Run1_F5	19379	14428	20170803_Serum_Native_Prefraction_Run1_F5.17590.17590.3	59.639	2892.2104	3	965.0774	1	DGSPDVTTADIGANTPDATK	20		DGSPDVTTADIGANTPDATK	1944.8911	947.3193	487080.8962	0	TARGET	sp|Q96PD5|PGRP2_HUMAN N-acetylmuramoyl-L-alanine amidase OS=Homo sapiens OX=9606 GN=PGLYRP2 PE=1 SV=1	0.0000	2.308E-8	39.268	33.887	76
20170803_Serum_Native_Prefraction_Run1_F5	19502	14526	20170803_Serum_Native_Prefraction_Run1_F5.17696.17696.2	59.899	2892.2226	2	1447.1186	1	DGSPDVTTADIGANTPDATK	20		DGSPDVTTADIGANTPDATK	1944.8911	947.3315	487087.1690	0	TARGET	sp|Q96PD5|PGRP2_HUMAN N-acetylmuramoyl-L-alanine amidase OS=Homo sapiens OX=9606 GN=PGLYRP2 PE=1 SV=1	0.0000	2.349E-3	26.597	25.653	38
20170803_Serum_Native_Prefraction_Run1_F5	28731	21795	20170803_Serum_Native_Prefraction_Run1_F5.25562.25562.3	79.430	2813.3061	3	938.7760	1	TFVLSALQPSPTHSSSNTQR	20		TFVLSALQPSPTHSSSNTQR	2157.0813	656.2248	304218.8535	0	TARGET	sp|P19827|ITIH1_HUMAN Inter-alpha-trypsin inhibitor heavy chain H1 OS=Homo sapiens OX=9606 GN=ITIH1 PE=1 SV=3	0.0000	1.37E-7	37.303	32.891	76
20170803_Serum_Native_Prefraction_Run1_F5	28843	21871	20170803_Serum_Native_Prefraction_Run1_F5.25645.25645.2	79.667	2813.3098	2	1407.6622	1	TFVLSALQPSPTHSSSNTQR	20		TFVLSALQPSPTHSSSNTQR	2157.0813	656.2285	304220.5688	0	TARGET	sp|P19827|ITIH1_HUMAN Inter-alpha-trypsin inhibitor heavy chain H1 OS=Homo sapiens OX=9606 GN=ITIH1 PE=1 SV=3	0.0000	1.456E-4	27.324	25.229	38
20170803_Serum_Native_Prefraction_Run1_F5	28905	21920	20170803_Serum_Native_Prefraction_Run1_F5.25698.25698.3	79.797	2813.3061	3	938.7760	1	TFVLSALQPSPTHSSSNTQR	20		TFVLSALQPSPTHSSSNTQR	2157.0813	656.2248	304218.8535	0	TARGET	sp|P19827|ITIH1_HUMAN Inter-alpha-trypsin inhibitor heavy chain H1 OS=Homo sapiens OX=9606 GN=ITIH1 PE=1 SV=3	0.0000	1.699E-5	32.986	31.194	76
20170803_Serum_Native_Prefraction_Run1_F5	28921	21933	20170803_Serum_Native_Prefraction_Run1_F5.25712.25712.4	79.831	2813.3078	4	704.3342	1	TFVLSALQPSPTHSSSNTQR	20		TFVLSALQPSPTHSSSNTQR	2157.0813	656.2265	304219.6416	0	TARGET	sp|P19827|ITIH1_HUMAN Inter-alpha-trypsin inhibitor heavy chain H1 OS=Homo sapiens OX=9606 GN=ITIH1 PE=1 SV=3	0.0000	1.975E-6	39.787	37.903	114
20170803_Serum_Native_Prefraction_Run1_F5	29017	21994	20170803_Serum_Native_Prefraction_Run1_F5.25779.25779.2	80.032	2813.3076	2	1407.6611	1	TFVLSALQPSPTHSSSNTQR	20		TFVLSALQPSPTHSSSNTQR	2157.0813	656.2263	304219.5489	0	TARGET	sp|P19827|ITIH1_HUMAN Inter-alpha-trypsin inhibitor heavy chain H1 OS=Homo sapiens OX=9606 GN=ITIH1 PE=1 SV=3	0.0000	1.722E-8	35.558	33.805	38
20170803_Serum_Native_Prefraction_Run1_F5	29081	22033	20170803_Serum_Native_Prefraction_Run1_F5.25822.25822.3	80.167	2813.3093	3	938.7770	1	TFVLSALQPSPTHSSSNTQR	20		TFVLSALQPSPTHSSSNTQR	2157.0813	656.2280	304220.3370	0	TARGET	sp|P19827|ITIH1_HUMAN Inter-alpha-trypsin inhibitor heavy chain H1 OS=Homo sapiens OX=9606 GN=ITIH1 PE=1 SV=3	0.0000	2.754E-8	39.935	38.073	76
20170803_Serum_Native_Prefraction_Run1_F5	29097	22043	20170803_Serum_Native_Prefraction_Run1_F5.25833.25833.4	80.201	2813.3039	4	704.3333	1	TFVLSALQPSPTHSSSNTQR	20		TFVLSALQPSPTHSSSNTQR	2157.0813	656.2226	304217.8336	0	TARGET	sp|P19827|ITIH1_HUMAN Inter-alpha-trypsin inhibitor heavy chain H1 OS=Homo sapiens OX=9606 GN=ITIH1 PE=1 SV=3	0.0000	1.071E-5	35.367	32.787	114
20170803_Serum_Native_Prefraction_Run1_F5	29257	22152	20170803_Serum_Native_Prefraction_Run1_F5.25952.25952.3	80.538	2813.3083	3	938.7767	1	TFVLSALQPSPTHSSSNTQR	20		TFVLSALQPSPTHSSSNTQR	2157.0813	656.2270	304219.8734	0	TARGET	sp|P19827|ITIH1_HUMAN Inter-alpha-trypsin inhibitor heavy chain H1 OS=Homo sapiens OX=9606 GN=ITIH1 PE=1 SV=3	0.0000	2.928E-6	34.785	32.953	76
20170803_Serum_Native_Prefraction_Run1_F6	7918	5061	20170803_Serum_Native_Prefraction_Run1_F6.7682.7682.3	36.238	2160.9318	3	721.3179	1	KVNCTTQPCPTAK	13	N3(115.0269);C4(160.0307);C9(160.0307)	KVN(115.0269)C(160.0307)TTQPC(160.0307)PTAK	1504.7014	656.2304	436120.0169	1	TARGET	sp|P04275|VWF_HUMAN von Willebrand factor OS=Homo sapiens OX=9606 GN=VWF PE=1 SV=4	0.0000	5.716E-4	27.053	18.707	48
20170803_Serum_Native_Prefraction_Run1_F6	7946	5080	20170803_Serum_Native_Prefraction_Run1_F6.7703.7703.2	36.298	2160.9253	2	1081.4699	1	KVNCTTQPCPTAK	13	N3(115.0269);C4(160.0307);C9(160.0307)	KVN(115.0269)C(160.0307)TTQPC(160.0307)PTAK	1504.7014	656.2239	436115.6971	1	TARGET	sp|P04275|VWF_HUMAN von Willebrand factor OS=Homo sapiens OX=9606 GN=VWF PE=1 SV=4	0.0000	5.011E-4	25.585	17.824	24
20170803_Serum_Native_Prefraction_Run1_F6	13201	9840	20170803_Serum_Native_Prefraction_Run1_F6.12795.12795.3	47.268	2468.0896	3	823.7038	1	APSHQQATTAGSPLR	15		APSHQQATTAGSPLR	1520.7694	947.3202	622921.6606	0	TARGET	sp|P12259|FA5_HUMAN Coagulation factor V OS=Homo sapiens OX=9606 GN=F5 PE=1 SV=4	0.0000	3.473E-6	36.657	31.194	56
20170803_Serum_Native_Prefraction_Run1_F6	13824	10379	20170803_Serum_Native_Prefraction_Run1_F6.13373.13373.2	48.570	2916.2590	2	1459.1368	1	ADLAKYICENQDSISSK	17	C8(160.0307)	ADLAKYIC(160.0307)ENQDSISSK	1940.9149	975.3441	502517.7044	1	TARGET	sp|P02768|ALBU_HUMAN Serum albumin OS=Homo sapiens OX=9606 GN=ALB PE=1 SV=2	0.0000	7.266E-4	24.905	19.654	32
20170803_Serum_Native_Prefraction_Run1_F6	14070	10591	20170803_Serum_Native_Prefraction_Run1_F6.13603.13603.2	49.089	1984.9187	2	993.4666	1	VQAAVGTSAAPVPSDNH	17		VQAAVGTSAAPVPSDNH	1619.7903	365.1284	225417.0802	0	TARGET	sp|P02649|APOE_HUMAN Apolipoprotein E OS=Homo sapiens OX=9606 GN=APOE PE=1 SV=1	0.0000	3.285E-3	23.698	20.063	32
20170803_Serum_Native_Prefraction_Run1_F6	15459	11805	20170803_Serum_Native_Prefraction_Run1_F6.14906.14906.3	52.005	2276.0200	3	759.6806	1	VQAAVGTSAAPVPSDNH	17		VQAAVGTSAAPVPSDNH	1619.7903	656.2297	405132.5039	0	TARGET	sp|P02649|APOE_HUMAN Apolipoprotein E OS=Homo sapiens OX=9606 GN=APOE PE=1 SV=1	0.0000	1.134E-12	48.091	39.458	64
20170803_Serum_Native_Prefraction_Run1_F6	15569	11897	20170803_Serum_Native_Prefraction_Run1_F6.15005.15005.2	52.237	2276.0168	2	1139.0157	1	VQAAVGTSAAPVPSDNH	17		VQAAVGTSAAPVPSDNH	1619.7903	656.2265	405130.5283	0	TARGET	sp|P02649|APOE_HUMAN Apolipoprotein E OS=Homo sapiens OX=9606 GN=APOE PE=1 SV=1	0.0000	1.082E-12	43.720	35.125	32
20170803_Serum_Native_Prefraction_Run1_F6	15745	12048	20170803_Serum_Native_Prefraction_Run1_F6.15167.15167.2	52.608	2276.0188	2	1139.0167	1	VQAAVGTSAAPVPSDNH	17		VQAAVGTSAAPVPSDNH	1619.7903	656.2285	405131.7630	0	TARGET	sp|P02649|APOE_HUMAN Apolipoprotein E OS=Homo sapiens OX=9606 GN=APOE PE=1 SV=1	0.0000	3.242E-15	48.033	39.461	32
20170803_Serum_Native_Prefraction_Run1_F6	15809	12096	20170803_Serum_Native_Prefraction_Run1_F6.15219.15219.3	52.743	2276.0175	3	759.6798	1	VQAAVGTSAAPVPSDNH	17		VQAAVGTSAAPVPSDNH	1619.7903	656.2273	405131.0222	0	TARGET	sp|P02649|APOE_HUMAN Apolipoprotein E OS=Homo sapiens OX=9606 GN=APOE PE=1 SV=1	0.0000	2.178E-10	45.993	39.785	64
20170803_Serum_Native_Prefraction_Run1_F6	15922	12184	20170803_Serum_Native_Prefraction_Run1_F6.15314.15314.2	52.979	2276.0151	2	1139.0148	1	VQAAVGTSAAPVPSDNH	17		VQAAVGTSAAPVPSDNH	1619.7903	656.2248	405129.4788	0	TARGET	sp|P02649|APOE_HUMAN Apolipoprotein E OS=Homo sapiens OX=9606 GN=APOE PE=1 SV=1	0.0000	2.395E-11	43.270	37.289	32
20170803_Serum_Native_Prefraction_Run1_F6	18956	14748	20170803_Serum_Native_Prefraction_Run1_F6.18071.18071.3	59.357	2519.1040	3	840.7086	1	HTSVQTTSSGSGPFTDVR	18		HTSVQTTSSGSGPFTDVR	1862.8757	656.2282	352266.2301	0	TARGET	sp|P02751|FINC_HUMAN Fibronectin OS=Homo sapiens OX=9606 GN=FN1 PE=1 SV=4	0.0000	9.995E-7	33.627	31.975	68
20170803_Serum_Native_Prefraction_Run1_F6	21227	16602	20170803_Serum_Native_Prefraction_Run1_F6.20071.20071.3	64.135	3037.3735	3	1013.4651	1	NNATVHEQVGGPSLTSDLQAQSK	23	N1(115.0269)	N(115.0269)NATVHEQVGGPSLTSDLQAQSK	2381.1458	656.2277	275593.2459	0	TARGET	sp|P04004|VTNC_HUMAN Vitronectin OS=Homo sapiens OX=9606 GN=VTN PE=1 SV=1	0.0000	1.0E-15	61.855	53.772	88
20170803_Serum_Native_Prefraction_Run1_F6	21823	17097	20170803_Serum_Native_Prefraction_Run1_F6.20606.20606.3	65.399	3328.4670	3	1110.4963	1	NNATVHEQVGGPSLTSDLQAQSK	23	N1(115.0269)	N(115.0269)NATVHEQVGGPSLTSDLQAQSK	2381.1458	947.3213	397842.6269	0	TARGET	sp|P04004|VTNC_HUMAN Vitronectin OS=Homo sapiens OX=9606 GN=VTN PE=1 SV=1	0.0000	2.401E-12	51.227	48.714	88
20170803_Serum_Native_Prefraction_Run1_F6	28719	21822	20170803_Serum_Native_Prefraction_Run1_F6.25778.25778.3	79.979	2813.3078	3	938.7765	1	TFVLSALQPSPTHSSSNTQR	20		TFVLSALQPSPTHSSSNTQR	2157.0813	656.2265	304219.6416	0	TARGET	sp|P19827|ITIH1_HUMAN Inter-alpha-trypsin inhibitor heavy chain H1 OS=Homo sapiens OX=9606 GN=ITIH1 PE=1 SV=3	0.0000	1.003E-6	35.265	31.062	76
20170803_Serum_Native_Prefraction_Run1_F6	40083	27555	20170803_Serum_Native_Prefraction_Run1_F6.32260.32260.3	104.096	3326.4599	3	1109.8272	1	DKFSEFWDLDPEVRPTSAVAA	21		DKFSEFWDLDPEVRPTSAVAA	2379.1382	947.3217	398178.5085	1	TARGET	sp|P02656|APOC3_HUMAN Apolipoprotein C-III OS=Homo sapiens OX=9606 GN=APOC3 PE=1 SV=1	0.0000	1.606E-3	25.479	21.019	80
20170803_Serum_Native_Prefraction_Run1_F7	6004	2605	20170803_Serum_Native_Prefraction_Run1_F7.5853.5853.2	34.968	2473.1218	2	1237.5682	1	SSTTKPPFKPHGSR	14		SSTTKPPFKPHGSR	1525.8000	947.3218	620868.9212	0	TARGET	sp|P04196|HRG_HUMAN Histidine-rich glycoprotein OS=Homo sapiens OX=9606 GN=HRG PE=1 SV=1	0.0000	7.064E-3	22.561	16.741	26
20170803_Serum_Native_Prefraction_Run1_F7	10140	6212	20170803_Serum_Native_Prefraction_Run1_F7.9755.9755.3	43.726	2176.9941	3	726.6720	1	APSHQQATTAGSPLR	15		APSHQQATTAGSPLR	1520.7694	656.2247	431508.3536	0	TARGET	sp|P12259|FA5_HUMAN Coagulation factor V OS=Homo sapiens OX=9606 GN=F5 PE=1 SV=4	0.0000	5.306E-7	33.755	23.797	56
20170803_Serum_Native_Prefraction_Run1_F7	17311	12611	20170803_Serum_Native_Prefraction_Run1_F7.16632.16632.3	58.782	2519.1030	3	840.7083	1	HTSVQTTSSGSGPFTDVR	18		HTSVQTTSSGSGPFTDVR	1862.8757	656.2273	352265.7470	0	TARGET	sp|P02751|FINC_HUMAN Fibronectin OS=Homo sapiens OX=9606 GN=FN1 PE=1 SV=4	0.0000	1.526E-8	34.386	33.436	68
20170803_Serum_Native_Prefraction_Run1_F7	17486	12766	20170803_Serum_Native_Prefraction_Run1_F7.16798.16798.3	59.149	2519.1010	3	840.7076	1	HTSVQTTSSGSGPFTDVR	18		HTSVQTTSSGSGPFTDVR	1862.8757	656.2253	352264.6734	0	TARGET	sp|P02751|FINC_HUMAN Fibronectin OS=Homo sapiens OX=9606 GN=FN1 PE=1 SV=4	0.0000	6.958E-11	47.540	41.485	68
20170803_Serum_Native_Prefraction_Run1_F7	17646	12903	20170803_Serum_Native_Prefraction_Run1_F7.16945.16945.2	59.480	2519.0964	2	1260.5555	1	HTSVQTTSSGSGPFTDVR	18		HTSVQTTSSGSGPFTDVR	1862.8757	656.2207	352262.2041	0	TARGET	sp|P02751|FINC_HUMAN Fibronectin OS=Homo sapiens OX=9606 GN=FN1 PE=1 SV=4	0.0000	1.433E-7	35.100	27.549	34
20170803_Serum_Native_Prefraction_Run1_F7	17660	12916	20170803_Serum_Native_Prefraction_Run1_F7.16959.16959.3	59.506	2519.1003	3	840.7074	1	HTSVQTTSSGSGPFTDVR	18		HTSVQTTSSGSGPFTDVR	1862.8757	656.2246	352264.2976	0	TARGET	sp|P02751|FINC_HUMAN Fibronectin OS=Homo sapiens OX=9606 GN=FN1 PE=1 SV=4	0.0000	1.439E-10	45.838	39.134	68
20170803_Serum_Native_Prefraction_Run1_F7	18498	13633	20170803_Serum_Native_Prefraction_Run1_F7.17742.17742.3	61.286	3666.5800	3	1223.2006	1	KVNCTTQPCPTAKAPTCGLCEVAR	24	N3(115.0269);C4(160.0307);C9(160.0307);C17(160.0307);C20(160.0307)	KVN(115.0269)C(160.0307)TTQPC(160.0307)PTAKAPTC(160.0307)GLC(160.0307)EVAR	2719.2549	947.3252	348376.7557	2	TARGET	sp|P04275|VWF_HUMAN von Willebrand factor OS=Homo sapiens OX=9606 GN=VWF PE=1 SV=4	0.0000	2.42E-7	38.708	36.797	92
20170803_Serum_Native_Prefraction_Run1_F7	18514	13647	20170803_Serum_Native_Prefraction_Run1_F7.17757.17757.4	61.319	3666.5827	4	917.6530	1	KVNCTTQPCPTAKAPTCGLCEVAR	24	N3(115.0269);C4(160.0307);C9(160.0307);C17(160.0307);C20(160.0307)	KVN(115.0269)C(160.0307)TTQPC(160.0307)PTAKAPTC(160.0307)GLC(160.0307)EVAR	2719.2549	947.3278	348377.7119	2	TARGET	sp|P04275|VWF_HUMAN von Willebrand factor OS=Homo sapiens OX=9606 GN=VWF PE=1 SV=4	0.0000	1.804E-7	38.118	38.104	138
20170803_Serum_Native_Prefraction_Run1_F7	18691	13796	20170803_Serum_Native_Prefraction_Run1_F7.17917.17917.4	61.692	3666.5729	4	917.6505	1	KVNCTTQPCPTAKAPTCGLCEVAR	24	N3(115.0269);C4(160.0307);C9(160.0307);C17(160.0307);C20(160.0307)	KVN(115.0269)C(160.0307)TTQPC(160.0307)PTAKAPTC(160.0307)GLC(160.0307)EVAR	2719.2549	947.3181	348374.1447	2	TARGET	sp|P04275|VWF_HUMAN von Willebrand factor OS=Homo sapiens OX=9606 GN=VWF PE=1 SV=4	0.0000	1.174E-3	28.934	21.694	138
20170803_Serum_Native_Prefraction_Run1_F7	19841	14592	20170803_Serum_Native_Prefraction_Run1_F7.18787.18787.3	64.116	3038.3745	3	1013.7988	1	NNATVHEQVGGPSLTSDLQAQSK	23	N1(115.0269);Q8(129.0426)	N(115.0269)NATVHEQ(129.0426)VGGPSLTSDLQAQSK	2382.1299	656.2446	275486.4880	0	TARGET	sp|P04004|VTNC_HUMAN Vitronectin OS=Homo sapiens OX=9606 GN=VTN PE=1 SV=1	0.0000	2.717E-7	41.899	40.886	88
20170803_Serum_Native_Prefraction_Run1_F7	30351	19889	20170803_Serum_Native_Prefraction_Run1_F7.24759.24759.3	86.344	2715.2314	3	906.0844	1	EQLKAVMDDFAAFVEK	16	M7(147.0354)	EQLKAVM(147.0354)DDFAAFVEK	1855.9025	859.3289	463024.8087	1	TARGET	sp|P02768|ALBU_HUMAN Serum albumin OS=Homo sapiens OX=9606 GN=ALB PE=1 SV=2	0.0000	3.062E-3	29.129	27.154	60
20170803_Serum_Native_Prefraction_Run1_F7	38730	23740	20170803_Serum_Native_Prefraction_Run1_F7.29151.29151.3	104.065	3327.4755	3	1110.1658	1	DKFSEFWDLDPEVRPTSAVAA	21		DKFSEFWDLDPEVRPTSAVAA	2379.1382	948.3374	398605.4278	1	TARGET	sp|P02656|APOC3_HUMAN Apolipoprotein C-III OS=Homo sapiens OX=9606 GN=APOC3 PE=1 SV=1	0.0000	3.163E-4	25.054	16.940	80
20170803_Serum_Native_Prefraction_Run1_F8	17561	12753	20170803_Serum_Native_Prefraction_Run1_F8.16490.16490.4	58.030	3375.4829	4	844.8780	1	KVNCTTQPCPTAKAPTCGLCEVAR	24	N3(115.0269);C4(160.0307);C9(160.0307);C17(160.0307);C20(160.0307)	KVN(115.0269)C(160.0307)TTQPC(160.0307)PTAKAPTC(160.0307)GLC(160.0307)EVAR	2719.2549	656.2280	241326.4016	2	TARGET	sp|P04275|VWF_HUMAN von Willebrand factor OS=Homo sapiens OX=9606 GN=VWF PE=1 SV=4	0.0000	5.015E-5	32.589	32.482	138
20170803_Serum_Native_Prefraction_Run1_F8	18961	13862	20170803_Serum_Native_Prefraction_Run1_F8.17690.17690.4	60.968	3666.5822	4	917.6528	1	KVNCTTQPCPTAKAPTCGLCEVAR	24	C4(160.0307);Q7(129.0426);C9(160.0307);C17(160.0307);C20(160.0307)	KVNC(160.0307)TTQ(129.0426)PC(160.0307)PTAKAPTC(160.0307)GLC(160.0307)EVAR	2719.2549	947.3273	348377.5280	2	TARGET	sp|P04275|VWF_HUMAN von Willebrand factor OS=Homo sapiens OX=9606 GN=VWF PE=1 SV=4	0.0000	5.762E-5	33.794	33.770	138
20170803_Serum_Native_Prefraction_Run1_F8	23597	14681	20170803_Serum_Native_Prefraction_Run1_F8.18799.18799.3	70.768	2449.0385	3	817.3534	1	CTTPPPSSGPTYQCLK	16	C1(160.0307);C14(160.0307)	C(160.0307)TTPPPSSGPTYQC(160.0307)LK	1792.8124	656.2262	366031.7164	0	TARGET	sp|P00747|PLMN_HUMAN Plasminogen OS=Homo sapiens OX=9606 GN=PLG PE=1 SV=2	0.0000	3.419E-3	24.787	17.837	60
20170803_Serum_Native_Prefraction_Run1_F8	23620	14692	20170803_Serum_Native_Prefraction_Run1_F8.18811.18811.3	70.816	2962.3794	3	988.4671	1	TVVQPSVGAAAGPVVPPCPGR	21	C18(160.0307)	TVVQPSVGAAAGPVVPPC(160.0307)PGR	2015.0621	947.3172	470118.1170	0	TARGET	sp|P02765|FETUA_HUMAN Alpha-2-HS-glycoprotein OS=Homo sapiens OX=9606 GN=AHSG PE=1 SV=1	0.0000	6.286E-7	35.235	29.345	80
20170803_Serum_Native_Prefraction_Run1_F8	23789	14734	20170803_Serum_Native_Prefraction_Run1_F8.18864.18864.3	71.175	2962.3855	3	988.4691	1	TVVQPSVGAAAGPVVPPCPGR	21	C18(160.0307)	TVVQPSVGAAAGPVVPPC(160.0307)PGR	2015.0621	947.3233	470121.1442	0	TARGET	sp|P02765|FETUA_HUMAN Alpha-2-HS-glycoprotein OS=Homo sapiens OX=9606 GN=AHSG PE=1 SV=1	0.0000	1.051E-7	39.763	35.965	80
20170803_Serum_Native_Prefraction_Run1_F8	24135	14827	20170803_Serum_Native_Prefraction_Run1_F8.18978.18978.3	71.907	2962.3764	3	988.4661	1	TVVQPSVGAAAGPVVPPCPGR	21	C18(160.0307)	TVVQPSVGAAAGPVVPPC(160.0307)PGR	2015.0621	947.3143	470116.6778	0	TARGET	sp|P02765|FETUA_HUMAN Alpha-2-HS-glycoprotein OS=Homo sapiens OX=9606 GN=AHSG PE=1 SV=1	0.0000	4.12E-5	24.592	20.277	80
20170803_Serum_Native_Prefraction_Run1_F8	25248	15217	20170803_Serum_Native_Prefraction_Run1_F8.19438.19438.3	74.271	2522.2116	3	841.7445	1	TFVLSALQPSPTHSSSNTQR	20		TFVLSALQPSPTHSSSNTQR	2157.0813	365.1303	169270.5324	0	TARGET	sp|P19827|ITIH1_HUMAN Inter-alpha-trypsin inhibitor heavy chain H1 OS=Homo sapiens OX=9606 GN=ITIH1 PE=1 SV=3	0.0000	1.311E-3	27.145	25.128	76
20170803_Serum_Native_Prefraction_Run1_F8	25417	15335	20170803_Serum_Native_Prefraction_Run1_F8.19567.19567.3	74.628	2522.2065	3	841.7428	1	TFVLSALQPSPTHSSSNTQR	20		TFVLSALQPSPTHSSSNTQR	2157.0813	365.1252	169268.1681	0	TARGET	sp|P19827|ITIH1_HUMAN Inter-alpha-trypsin inhibitor heavy chain H1 OS=Homo sapiens OX=9606 GN=ITIH1 PE=1 SV=3	0.0000	1.236E-5	39.782	33.497	76
20170803_Serum_Native_Prefraction_Run1_F8	29562	18041	20170803_Serum_Native_Prefraction_Run1_F8.22560.22560.5	83.427	4856.1005	5	972.2274	1	IPSCDSSPVSTEQLAPTAPPELTPVVQDCYHGDGQSYR	38	C4(160.0307);Q27(129.0426);C29(160.0307)	IPSC(160.0307)DSSPVSTEQLAPTAPPELTPVVQ(129.0426)DC(160.0307)YHGDGQSYR	4158.8789	697.2216	167646.5261	0	TARGET	sp|P00747|PLMN_HUMAN Plasminogen OS=Homo sapiens OX=9606 GN=PLG PE=1 SV=2	0.0000	8.865E-7	34.870	32.182	296
20170803_Serum_Native_Prefraction_Run1_F8	29643	18088	20170803_Serum_Native_Prefraction_Run1_F8.22612.22612.3	83.597	4814.1235	3	1605.7151	1	IPSCDSSPVSTEQLAPTAPPELTPVVQDCYHGDGQSYR	38	C4(160.0307);C29(160.0307)	IPSC(160.0307)DSSPVSTEQLAPTAPPELTPVVQDC(160.0307)YHGDGQSYR	4157.8945	656.2290	157827.2368	0	TARGET	sp|P00747|PLMN_HUMAN Plasminogen OS=Homo sapiens OX=9606 GN=PLG PE=1 SV=2	0.0000	5.925E-5	35.301	35.090	148
20170803_Serum_Native_Prefraction_Run1_F8	29802	18186	20170803_Serum_Native_Prefraction_Run1_F8.22720.22720.4	83.933	4814.1298	4	1204.5397	1	IPSCDSSPVSTEQLAPTAPPELTPVVQDCYHGDGQSYR	38	C4(160.0307);C29(160.0307)	IPSC(160.0307)DSSPVSTEQLAPTAPPELTPVVQDC(160.0307)YHGDGQSYR	4157.8945	656.2353	157828.7520	0	TARGET	sp|P00747|PLMN_HUMAN Plasminogen OS=Homo sapiens OX=9606 GN=PLG PE=1 SV=2	0.0000	5.591E-8	37.472	37.055	222
20170803_Serum_Native_Prefraction_Run1_F8	29851	18226	20170803_Serum_Native_Prefraction_Run1_F8.22763.22763.5	84.037	4816.1240	5	964.2321	1	IPSCDSSPVSTEQLAPTAPPELTPVVQDCYHGDGQSYR	38	C4(160.0307);Q27(129.0426);C29(160.0307)	IPSC(160.0307)DSSPVSTEQLAPTAPPELTPVVQ(129.0426)DC(160.0307)YHGDGQSYR	4158.8789	657.2451	158034.2000	0	TARGET	sp|P00747|PLMN_HUMAN Plasminogen OS=Homo sapiens OX=9606 GN=PLG PE=1 SV=2	0.0000	1.736E-5	37.072	36.931	296
20170803_Serum_Native_Prefraction_Run1_F9	22929	12773	20170803_Serum_Native_Prefraction_Run1_F9.17256.17256.3	70.774	2962.3850	3	988.4689	1	TVVQPSVGAAAGPVVPPCPGR	21	C18(160.0307)	TVVQPSVGAAAGPVVPPC(160.0307)PGR	2015.0621	947.3228	470120.8960	0	TARGET	sp|P02765|FETUA_HUMAN Alpha-2-HS-glycoprotein OS=Homo sapiens OX=9606 GN=AHSG PE=1 SV=1	0.0000	7.16E-8	32.862	25.394	80
20170803_Serum_Native_Prefraction_Run1_F9	22987	12793	20170803_Serum_Native_Prefraction_Run1_F9.17280.17280.2	70.898	2962.3933	2	1482.2039	1	TVVQPSVGAAAGPVVPPCPGR	21	C18(160.0307)	TVVQPSVGAAAGPVVPPC(160.0307)PGR	2015.0621	947.3312	470125.0646	0	TARGET	sp|P02765|FETUA_HUMAN Alpha-2-HS-glycoprotein OS=Homo sapiens OX=9606 GN=AHSG PE=1 SV=1	0.0000	2.1E-6	28.849	25.477	40
20170803_Serum_Native_Prefraction_Run1_F9	23094	12824	20170803_Serum_Native_Prefraction_Run1_F9.17318.17318.3	71.125	2962.3813	3	988.4677	1	TVVQPSVGAAAGPVVPPCPGR	21	C18(160.0307)	TVVQPSVGAAAGPVVPPC(160.0307)PGR	2015.0621	947.3192	470119.1095	0	TARGET	sp|P02765|FETUA_HUMAN Alpha-2-HS-glycoprotein OS=Homo sapiens OX=9606 GN=AHSG PE=1 SV=1	0.0000	5.161E-9	42.093	31.114	80
20170803_Serum_Native_Prefraction_Run1_F9	23126	12838	20170803_Serum_Native_Prefraction_Run1_F9.17334.17334.4	71.193	2962.3850	4	741.6035	1	TVVQPSVGAAAGPVVPPCPGR	21	C18(160.0307)	TVVQPSVGAAAGPVVPPC(160.0307)PGR	2015.0621	947.3228	470120.8960	0	TARGET	sp|P02765|FETUA_HUMAN Alpha-2-HS-glycoprotein OS=Homo sapiens OX=9606 GN=AHSG PE=1 SV=1	0.0000	5.661E-10	44.464	35.447	120
20170803_Serum_Native_Prefraction_Run1_F9	23160	12850	20170803_Serum_Native_Prefraction_Run1_F9.17348.17348.2	71.264	2962.3786	2	1482.1966	1	TVVQPSVGAAAGPVVPPCPGR	21	C18(160.0307)	TVVQPSVGAAAGPVVPPC(160.0307)PGR	2015.0621	947.3165	470117.7696	0	TARGET	sp|P02765|FETUA_HUMAN Alpha-2-HS-glycoprotein OS=Homo sapiens OX=9606 GN=AHSG PE=1 SV=1	0.0000	3.458E-9	39.360	27.796	40
20170803_Serum_Native_Prefraction_Run1_F9	23254	12870	20170803_Serum_Native_Prefraction_Run1_F9.17374.17374.3	71.464	2962.3850	3	988.4689	1	TVVQPSVGAAAGPVVPPCPGR	21	C18(160.0307)	TVVQPSVGAAAGPVVPPC(160.0307)PGR	2015.0621	947.3228	470120.8960	0	TARGET	sp|P02765|FETUA_HUMAN Alpha-2-HS-glycoprotein OS=Homo sapiens OX=9606 GN=AHSG PE=1 SV=1	0.0000	4.157E-8	42.066	34.980	80
20170803_Serum_Native_Prefraction_Run1_F9	23287	12880	20170803_Serum_Native_Prefraction_Run1_F9.17386.17386.4	71.534	2962.3828	4	741.6030	1	TVVQPSVGAAAGPVVPPCPGR	21	C18(160.0307)	TVVQPSVGAAAGPVVPPC(160.0307)PGR	2015.0621	947.3206	470119.8042	0	TARGET	sp|P02765|FETUA_HUMAN Alpha-2-HS-glycoprotein OS=Homo sapiens OX=9606 GN=AHSG PE=1 SV=1	0.0000	7.376E-6	26.850	21.731	120
20170803_Serum_Native_Prefraction_Run1_F9	23415	12924	20170803_Serum_Native_Prefraction_Run1_F9.17438.17438.3	71.804	2962.3823	3	988.4680	1	TVVQPSVGAAAGPVVPPCPGR	21	C18(160.0307)	TVVQPSVGAAAGPVVPPC(160.0307)PGR	2015.0621	947.3202	470119.6057	0	TARGET	sp|P02765|FETUA_HUMAN Alpha-2-HS-glycoprotein OS=Homo sapiens OX=9606 GN=AHSG PE=1 SV=1	0.0000	1.617E-6	37.346	32.608	80
20170803_Serum_Native_Prefraction_Run1_F9	23470	12937	20170803_Serum_Native_Prefraction_Run1_F9.17454.17454.4	71.920	2962.3852	4	741.6036	1	TVVQPSVGAAAGPVVPPCPGR	21	C18(160.0307)	TVVQPSVGAAAGPVVPPC(160.0307)PGR	2015.0621	947.3231	470121.0449	0	TARGET	sp|P02765|FETUA_HUMAN Alpha-2-HS-glycoprotein OS=Homo sapiens OX=9606 GN=AHSG PE=1 SV=1	0.0000	7.177E-3	20.140	16.509	120
20170803_Serum_Native_Prefraction_Run1_F9	23591	12981	20170803_Serum_Native_Prefraction_Run1_F9.17506.17506.3	72.178	2962.3838	3	988.4685	1	TVVQPSVGAAAGPVVPPCPGR	21	C18(160.0307)	TVVQPSVGAAAGPVVPPC(160.0307)PGR	2015.0621	947.3216	470120.3005	0	TARGET	sp|P02765|FETUA_HUMAN Alpha-2-HS-glycoprotein OS=Homo sapiens OX=9606 GN=AHSG PE=1 SV=1	0.0000	2.335E-10	44.508	31.858	80
20170803_Serum_Native_Prefraction_Run1_F9	23766	13022	20170803_Serum_Native_Prefraction_Run1_F9.17558.17558.3	72.551	2962.3813	3	988.4677	1	TVVQPSVGAAAGPVVPPCPGR	21	C18(160.0307)	TVVQPSVGAAAGPVVPPC(160.0307)PGR	2015.0621	947.3192	470119.1095	0	TARGET	sp|P02765|FETUA_HUMAN Alpha-2-HS-glycoprotein OS=Homo sapiens OX=9606 GN=AHSG PE=1 SV=1	0.0000	1.349E-8	39.868	30.232	80
20170803_Serum_Native_Prefraction_Run1_F9	23929	13063	20170803_Serum_Native_Prefraction_Run1_F9.17609.17609.3	72.897	2962.3745	3	988.4654	1	TVVQPSVGAAAGPVVPPCPGR	21	C18(160.0307)	TVVQPSVGAAAGPVVPPC(160.0307)PGR	2015.0621	947.3123	470115.6853	0	TARGET	sp|P02765|FETUA_HUMAN Alpha-2-HS-glycoprotein OS=Homo sapiens OX=9606 GN=AHSG PE=1 SV=1	0.0000	6.857E-6	28.421	23.327	80
20170803_Serum_Native_Prefraction_Run1_F9	24644	13481	20170803_Serum_Native_Prefraction_Run1_F9.18076.18076.3	74.427	2522.2121	3	841.7446	1	TFVLSALQPSPTHSSSNTQR	20		TFVLSALQPSPTHSSSNTQR	2157.0813	365.1308	169270.7642	0	TARGET	sp|P19827|ITIH1_HUMAN Inter-alpha-trypsin inhibitor heavy chain H1 OS=Homo sapiens OX=9606 GN=ITIH1 PE=1 SV=3	0.0000	3.772E-7	39.819	35.338	76
20170803_Serum_Native_Prefraction_Run1_F9	25320	13971	20170803_Serum_Native_Prefraction_Run1_F9.18608.18608.4	75.856	4210.7963	4	1053.7064	1	VQNHCQEPYYQAAAAGALTCATPGTWKDR	29	C5(160.0307);C20(160.0307)	VQNHC(160.0307)QEPYYQAAAAGALTC(160.0307)ATPGTWKDR	3263.4875	947.3088	290274.9896	1	TARGET	sp|Q9NZP8|C1RL_HUMAN Complement C1r subcomponent-like protein OS=Homo sapiens OX=9606 GN=C1RL PE=1 SV=2	0.0000	4.968E-10	43.821	43.729	168
20170803_Serum_Native_Prefraction_Run1_F9	27727	15816	20170803_Serum_Native_Prefraction_Run1_F9.20612.20612.4	80.964	3939.6791	4	985.9271	1	VQNHCQEPYYQAAAAGALTCATPGTWK	27	C5(160.0307);C20(160.0307)	VQNHC(160.0307)QEPYYQAAAAGALTC(160.0307)ATPGTWK	2992.3596	947.3195	316579.4312	0	TARGET	sp|Q9NZP8|C1RL_HUMAN Complement C1r subcomponent-like protein OS=Homo sapiens OX=9606 GN=C1RL PE=1 SV=2	0.0000	2.003E-10	49.668	46.893	156
20170803_Serum_Native_Prefraction_Run1_F9	28681	16461	20170803_Serum_Native_Prefraction_Run1_F9.21343.21343.4	83.066	4814.1289	4	1204.5395	1	IPSCDSSPVSTEQLAPTAPPELTPVVQDCYHGDGQSYR	38	C4(160.0307);C29(160.0307)	IPSC(160.0307)DSSPVSTEQLAPTAPPELTPVVQDC(160.0307)YHGDGQSYR	4157.8945	656.2343	157828.5115	0	TARGET	sp|P00747|PLMN_HUMAN Plasminogen OS=Homo sapiens OX=9606 GN=PLG PE=1 SV=2	0.0000	3.957E-7	35.170	34.998	222
20170803_Serum_Native_Prefraction_Run1_F9	28856	16572	20170803_Serum_Native_Prefraction_Run1_F9.21465.21465.4	83.436	4814.1137	4	1204.5357	1	IPSCDSSPVSTEQLAPTAPPELTPVVQDCYHGDGQSYR	38	C4(160.0307);C29(160.0307)	IPSC(160.0307)DSSPVSTEQLAPTAPPELTPVVQDC(160.0307)YHGDGQSYR	4157.8945	656.2192	157824.8799	0	TARGET	sp|P00747|PLMN_HUMAN Plasminogen OS=Homo sapiens OX=9606 GN=PLG PE=1 SV=2	0.0000	7.955E-7	33.051	30.941	222

## Sheet: Peptide
Sequence	Modifications	Length	Missed Cleavages	Mass	Previous AA	Leading Protein	Next AA	Proteins	Hit Type	Charges	# PSM	Scans	num_tol_term	num_tot_proteins
TVVQPSVGAAAGPVVPPCPGR	C18(160.0307)	21	0	2015.0621	R	sp|P02765|FETUA_HUMAN Alpha-2-HS-glycoprotein OS=Homo sapiens OX=9606 GN=AHSG PE=1 SV=1	I	sp|P02765|FETUA_HUMAN Alpha-2-HS-glycoprotein OS=Homo sapiens OX=9606 GN=AHSG PE=1 SV=1	TARGET	2;3;4	42	23511;23542;23682;23849;24318;24481;20758;20781;20798;20922;20954;21078;21105;21249;21279;21418;21453;21578;21626;21738;21813;21901;20329;20505;21416;21010;22088;23620;23789;24135;22929;22987;23094;23126;23160;23254;23287;23415;23470;23591;23766;23929	2	1
DHSHGPPLPQGPPPLLPMSCSSCQHATFGTNGAQR	C20(160.0307);C23(160.0307);N31(115.0269)	35	0	3736.6931	R	sp|P04196|HRG_HUMAN Histidine-rich glycoprotein OS=Homo sapiens OX=9606 GN=HRG PE=1 SV=1	H	sp|P04196|HRG_HUMAN Histidine-rich glycoprotein OS=Homo sapiens OX=9606 GN=HRG PE=1 SV=1	TARGET	5	1	26947	2	1
SPDESTPELSAEPTPK		16	0	1683.7838	K	sp|Q92954|PRG4_HUMAN Proteoglycan 4 OS=Homo sapiens OX=9606 GN=PRG4 PE=1 SV=3	A	sp|Q92954|PRG4_HUMAN Proteoglycan 4 OS=Homo sapiens OX=9606 GN=PRG4 PE=1 SV=3	TARGET	2	1	19201	2	1
DGSPDVTTADIGANTPDATK		20	0	1944.8911	R	sp|Q96PD5|PGRP2_HUMAN N-acetylmuramoyl-L-alanine amidase OS=Homo sapiens OX=9606 GN=PGLYRP2 PE=1 SV=1	G	sp|Q96PD5|PGRP2_HUMAN N-acetylmuramoyl-L-alanine amidase OS=Homo sapiens OX=9606 GN=PGLYRP2 PE=1 SV=1	TARGET	2;3	3	19069;19379;19502	2	1
GVAHNNLMAMAQETGDNLYWGSVTGSQSNAVSPTPAPR	N29(115.0269)	38	0	3928.8105	R	sp|P0C0L5|CO4B_HUMAN Complement C4-B OS=Homo sapiens OX=9606 GN=C4B PE=1 SV=2	N	sp|P0C0L5|CO4B_HUMAN Complement C4-B OS=Homo sapiens OX=9606 GN=C4B PE=1 SV=2	TARGET	4	1	34884	2	1
RPCFSALEVDETYVPKEFNAETFTFHADICTLSEK	C3(160.0307);N19(115.0269);C30(160.0307)	35	1	4151.9136	R	sp|P02768|ALBU_HUMAN Serum albumin OS=Homo sapiens OX=9606 GN=ALB PE=1 SV=2	E	sp|P02768|ALBU_HUMAN Serum albumin OS=Homo sapiens OX=9606 GN=ALB PE=1 SV=2	TARGET	3	2	31488;31657	2	1
HYTNPSQDVTVPCPVPSTPPTPSPSTPPTPSPSCCHPR	C34(160.0307);C35(160.0307);C13(160.0307)	38	0	4135.8828	K	sp|P01876|IGHA1_HUMAN Immunoglobulin heavy constant alpha 1 OS=Homo sapiens OX=9606 GN=IGHA1 PE=1 SV=2	L	sp|P01876|IGHA1_HUMAN Immunoglobulin heavy constant alpha 1 OS=Homo sapiens OX=9606 GN=IGHA1 PE=1 SV=2	TARGET	3;4;5;6;7	60	20949;20992;21040;21104;21122;21169;21220;21281;21319;21331;21392;21456;21505;21531;21568;21584;21633;21635;21681;21763;21798;21809;22100;22114;22444;22519;22560;22967;18482;18828;19812;19979;20028;20091;20183;20246;20347;20410;20458;20522;19043;19104;19373;19396;19437;19503;19575;19677;19679;19739;19834;20009;20120;20137;20184;20296;20347;20472;20491;20792	2	1
KVNCTTQPCPTAK	N3(115.0269);C4(160.0307);C9(160.0307)	13	1	1504.7014	R	sp|P04275|VWF_HUMAN von Willebrand factor OS=Homo sapiens OX=9606 GN=VWF PE=1 SV=4	A	sp|P04275|VWF_HUMAN von Willebrand factor OS=Homo sapiens OX=9606 GN=VWF PE=1 SV=4	TARGET	2;3	3	7878;7918;7946	2	1
EQLKAVMDDFAAFVEK	M7(147.0354)	16	1	1855.9025	K	sp|P02768|ALBU_HUMAN Serum albumin OS=Homo sapiens OX=9606 GN=ALB PE=1 SV=2	C	sp|P02768|ALBU_HUMAN Serum albumin OS=Homo sapiens OX=9606 GN=ALB PE=1 SV=2	TARGET	3	1	30351	2	1
VQNHCQEPYYQAAAAGALTCATPGTWK	C5(160.0307);C20(160.0307)	27	0	2992.3596	K	sp|Q9NZP8|C1RL_HUMAN Complement C1r subcomponent-like protein OS=Homo sapiens OX=9606 GN=C1RL PE=1 SV=2	D	sp|Q9NZP8|C1RL_HUMAN Complement C1r subcomponent-like protein OS=Homo sapiens OX=9606 GN=C1RL PE=1 SV=2	TARGET	3;4	2	26366;27727	2	1
GVAHNNLMAMAQETGDNLYWGSVTGSQSNAVSPTPAPR	M10(147.0354);N17(115.0269)	38	0	3944.8057	R	sp|P0C0L5|CO4B_HUMAN Complement C4-B OS=Homo sapiens OX=9606 GN=C4B PE=1 SV=2	N	sp|P0C0L5|CO4B_HUMAN Complement C4-B OS=Homo sapiens OX=9606 GN=C4B PE=1 SV=2	TARGET	4	2	30486;34052	2	1
SSTTKPPFKPHGSR		14	0	1525.8000	R	sp|P04196|HRG_HUMAN Histidine-rich glycoprotein OS=Homo sapiens OX=9606 GN=HRG PE=1 SV=1	D	sp|P04196|HRG_HUMAN Histidine-rich glycoprotein OS=Homo sapiens OX=9606 GN=HRG PE=1 SV=1	TARGET	2;4	2	6224;6004	2	1
KCQCDELCSYYQSCCTDYTAECKPQVTR	C2(160.0307);Q3(129.0426);C4(160.0307);C8(160.0307);Q12(129.0426);C14(160.0307);C15(160.0307);C22(160.0307)	28	1	3611.4075	K	sp|P04004|VTNC_HUMAN Vitronectin OS=Homo sapiens OX=9606 GN=VTN PE=1 SV=1	G	sp|P04004|VTNC_HUMAN Vitronectin OS=Homo sapiens OX=9606 GN=VTN PE=1 SV=1	TARGET	4	1	25451	2	1
ADIGCTPGSGKDYAGVFSDAGLTFTSSSGQQTAQR	C5(160.0307)	35	1	3536.6113	K	sp|P01024|CO3_HUMAN Complement C3 OS=Homo sapiens OX=9606 GN=C3 PE=1 SV=2	A	sp|P01024|CO3_HUMAN Complement C3 OS=Homo sapiens OX=9606 GN=C3 PE=1 SV=2	TARGET	3	1	42334	2	1
GVAHNNLMAMAQETGDNLYWGSVTGSQSNAVSPTPAPR	M8(147.0354)	38	0	3943.8215	R	sp|P0C0L5|CO4B_HUMAN Complement C4-B OS=Homo sapiens OX=9606 GN=C4B PE=1 SV=2	N	sp|P0C0L5|CO4B_HUMAN Complement C4-B OS=Homo sapiens OX=9606 GN=C4B PE=1 SV=2	TARGET	5	1	33788	2	1
NNATVHEQVGGPSLTSDLQAQSK	N1(115.0269);Q8(129.0426)	23	0	2382.1299	K	sp|P04004|VTNC_HUMAN Vitronectin OS=Homo sapiens OX=9606 GN=VTN PE=1 SV=1	G	sp|P04004|VTNC_HUMAN Vitronectin OS=Homo sapiens OX=9606 GN=VTN PE=1 SV=1	TARGET	3	1	19841	2	1
EHEGAIYPDNTTDFQRADDK	N10(115.0269)	20	1	2322.0034	K	sp|P00450|CERU_HUMAN Ceruloplasmin OS=Homo sapiens OX=9606 GN=CP PE=1 SV=1	V	sp|P00450|CERU_HUMAN Ceruloplasmin OS=Homo sapiens OX=9606 GN=CP PE=1 SV=1	TARGET	3;4	2	20716;20725	2	1
FVSVTCDFFESQAPATGSENSAVNQKPTNLPK	C6(160.0307)	32	0	3469.6460	K	sp|Q9UGM5|FETUB_HUMAN Fetuin-B OS=Homo sapiens OX=9606 GN=FETUB PE=1 SV=2	V	sp|Q9UGM5|FETUB_HUMAN Fetuin-B OS=Homo sapiens OX=9606 GN=FETUB PE=1 SV=2	TARGET	4	1	29665	2	1
NNATVHEQVGGPSLTSDLQAQSK	N1(115.0269)	23	0	2381.1458	K	sp|P04004|VTNC_HUMAN Vitronectin OS=Homo sapiens OX=9606 GN=VTN PE=1 SV=1	G	sp|P04004|VTNC_HUMAN Vitronectin OS=Homo sapiens OX=9606 GN=VTN PE=1 SV=1	TARGET	3	2	21227;21823	2	1
GVAHNNLMAMAQETGDNLYWGSVTGSQSNAVSPTPAPR	M8(147.0354);M10(147.0354)	38	0	3959.8164	R	sp|P0C0L5|CO4B_HUMAN Complement C4-B OS=Homo sapiens OX=9606 GN=C4B PE=1 SV=2	N	sp|P0C0L5|CO4B_HUMAN Complement C4-B OS=Homo sapiens OX=9606 GN=C4B PE=1 SV=2	TARGET	4	1	40864	2	1
DKFSEFWDLDPEVRPTSAVAA		21	1	2379.1382	K	sp|P02656|APOC3_HUMAN Apolipoprotein C-III OS=Homo sapiens OX=9606 GN=APOC3 PE=1 SV=1	-	sp|P02656|APOC3_HUMAN Apolipoprotein C-III OS=Homo sapiens OX=9606 GN=APOC3 PE=1 SV=1	TARGET	3	2	40083;38730	2	1
GVAHNNLMAMAQETGDNLYWGSVTGSQSNAVSPTPAPR	N17(115.0269)	38	0	3928.8105	R	sp|P0C0L5|CO4B_HUMAN Complement C4-B OS=Homo sapiens OX=9606 GN=C4B PE=1 SV=2	N	sp|P0C0L5|CO4B_HUMAN Complement C4-B OS=Homo sapiens OX=9606 GN=C4B PE=1 SV=2	TARGET	5	1	38641	2	1
IPSCDSSPVSTEQLAPTAPPELTPVVQDCYHGDGQSYR	C4(160.0307);C29(160.0307)	38	0	4157.8945	K	sp|P00747|PLMN_HUMAN Plasminogen OS=Homo sapiens OX=9606 GN=PLG PE=1 SV=2	G	sp|P00747|PLMN_HUMAN Plasminogen OS=Homo sapiens OX=9606 GN=PLG PE=1 SV=2	TARGET	3;4	4	29643;29802;28681;28856	2	1
TFVLSALQPSPTHSSSNTQR	N17(115.0269)	20	0	2158.0652	R	sp|P19827|ITIH1_HUMAN Inter-alpha-trypsin inhibitor heavy chain H1 OS=Homo sapiens OX=9606 GN=ITIH1 PE=1 SV=3	L	sp|P19827|ITIH1_HUMAN Inter-alpha-trypsin inhibitor heavy chain H1 OS=Homo sapiens OX=9606 GN=ITIH1 PE=1 SV=3	TARGET	3	2	28377;27048	2	1
GVAHNNLMAMAQETGDNLYWGSVTGSQSNAVSPTPAPR	M10(147.0354)	38	0	3943.8215	R	sp|P0C0L5|CO4B_HUMAN Complement C4-B OS=Homo sapiens OX=9606 GN=C4B PE=1 SV=2	N	sp|P0C0L5|CO4B_HUMAN Complement C4-B OS=Homo sapiens OX=9606 GN=C4B PE=1 SV=2	TARGET	3;4;5	4	31684;35059;27597;32212	2	1
IPSCDSSPVSTEQLAPTAPPELTPVVQDCYHGDGQSYR	C4(160.0307);Q27(129.0426);C29(160.0307)	38	0	4158.8789	K	sp|P00747|PLMN_HUMAN Plasminogen OS=Homo sapiens OX=9606 GN=PLG PE=1 SV=2	G	sp|P00747|PLMN_HUMAN Plasminogen OS=Homo sapiens OX=9606 GN=PLG PE=1 SV=2	TARGET	5	2	29562;29851	2	1
CTTPPPSSGPTYQCLK	C1(160.0307);C14(160.0307)	16	0	1792.8124	R	sp|P00747|PLMN_HUMAN Plasminogen OS=Homo sapiens OX=9606 GN=PLG PE=1 SV=2	G	sp|P00747|PLMN_HUMAN Plasminogen OS=Homo sapiens OX=9606 GN=PLG PE=1 SV=2	TARGET	3	1	23597	2	1
VQAAVGTSAAPVPSDNH		17	0	1619.7903	K	sp|P02649|APOE_HUMAN Apolipoprotein E OS=Homo sapiens OX=9606 GN=APOE PE=1 SV=1	-	sp|P02649|APOE_HUMAN Apolipoprotein E OS=Homo sapiens OX=9606 GN=APOE PE=1 SV=1	TARGET	2;3	6	14070;15459;15569;15745;15809;15922	2	1
GVAHNNLMAMAQETGDNLYWGSVTGSQSNAVSPTPAPR		38	0	3927.8267	R	sp|P0C0L5|CO4B_HUMAN Complement C4-B OS=Homo sapiens OX=9606 GN=C4B PE=1 SV=2	N	sp|P0C0L5|CO4B_HUMAN Complement C4-B OS=Homo sapiens OX=9606 GN=C4B PE=1 SV=2	TARGET	3;4	3	36303;38705;38720	2	1
GVAHNNLMAMAQETGDNLYWGSVTGSQSNAVSPTPAPR	N5(115.0269);N6(115.0269);M10(147.0354)	38	0	3945.7896	R	sp|P0C0L5|CO4B_HUMAN Complement C4-B OS=Homo sapiens OX=9606 GN=C4B PE=1 SV=2	N	sp|P0C0L5|CO4B_HUMAN Complement C4-B OS=Homo sapiens OX=9606 GN=C4B PE=1 SV=2	TARGET	4	1	43499	2	1
GVAHNNLMAMAQETGDNLYWGSVTGSQSNAVSPTPAPR	N5(115.0269);N6(115.0269);M10(147.0354);N29(115.0269)	38	0	3946.7737	R	sp|P0C0L5|CO4B_HUMAN Complement C4-B OS=Homo sapiens OX=9606 GN=C4B PE=1 SV=2	N	sp|P0C0L5|CO4B_HUMAN Complement C4-B OS=Homo sapiens OX=9606 GN=C4B PE=1 SV=2	TARGET	4	1	27149	2	1
GVAHNNLMAMAQETGDNLYWGSVTGSQSNAVSPTPAPR	M10(147.0354);Q12(129.0426);Q27(129.0426)	38	0	3945.7896	R	sp|P0C0L5|CO4B_HUMAN Complement C4-B OS=Homo sapiens OX=9606 GN=C4B PE=1 SV=2	N	sp|P0C0L5|CO4B_HUMAN Complement C4-B OS=Homo sapiens OX=9606 GN=C4B PE=1 SV=2	TARGET	4	2	33587;33684	2	1
DANISQPETTKEGLR		15	1	1657.8270	K	sp|Q13790|APOF_HUMAN Apolipoprotein F OS=Homo sapiens OX=9606 GN=APOF PE=1 SV=2	A	sp|Q13790|APOF_HUMAN Apolipoprotein F OS=Homo sapiens OX=9606 GN=APOF PE=1 SV=2	TARGET	3	1	15872	2	1
VQNHCQEPYYQAAAAGALTCATPGTWKDR	C5(160.0307);C20(160.0307)	29	1	3263.4875	K	sp|Q9NZP8|C1RL_HUMAN Complement C1r subcomponent-like protein OS=Homo sapiens OX=9606 GN=C1RL PE=1 SV=2	Q	sp|Q9NZP8|C1RL_HUMAN Complement C1r subcomponent-like protein OS=Homo sapiens OX=9606 GN=C1RL PE=1 SV=2	TARGET	4	1	25320	2	1
GVAHNNLMAMAQETGDNLYWGSVTGSQSNAVSPTPAPR	Q27(129.0426)	38	0	3928.8105	R	sp|P0C0L5|CO4B_HUMAN Complement C4-B OS=Homo sapiens OX=9606 GN=C4B PE=1 SV=2	N	sp|P0C0L5|CO4B_HUMAN Complement C4-B OS=Homo sapiens OX=9606 GN=C4B PE=1 SV=2	TARGET	6	1	38687	2	1
KVNCTTQPCPTAKAPTCGLCEVAR	C4(160.0307);Q7(129.0426);C9(160.0307);C17(160.0307);C20(160.0307)	24	2	2719.2549	R	sp|P04275|VWF_HUMAN von Willebrand factor OS=Homo sapiens OX=9606 GN=VWF PE=1 SV=4	L	sp|P04275|VWF_HUMAN von Willebrand factor OS=Homo sapiens OX=9606 GN=VWF PE=1 SV=4	TARGET	4	1	18961	2	1
HYTNPSQDVTVPCPVPSTPPTPSPSTPPTPSPSCCHPR	C34(160.0307);C35(160.0307);Q7(129.0426);C13(160.0307)	38	0	4136.8667	K	sp|P01876|IGHA1_HUMAN Immunoglobulin heavy constant alpha 1 OS=Homo sapiens OX=9606 GN=IGHA1 PE=1 SV=2	L	sp|P01876|IGHA1_HUMAN Immunoglobulin heavy constant alpha 1 OS=Homo sapiens OX=9606 GN=IGHA1 PE=1 SV=2	TARGET	4	1	22791	2	1
GVAHNNLMAMAQETGDNLYWGSVTGSQSNAVSPTPAPR	N5(115.0269);M8(147.0354);M10(147.0354)	38	0	3960.8005	R	sp|P0C0L5|CO4B_HUMAN Complement C4-B OS=Homo sapiens OX=9606 GN=C4B PE=1 SV=2	N	sp|P0C0L5|CO4B_HUMAN Complement C4-B OS=Homo sapiens OX=9606 GN=C4B PE=1 SV=2	TARGET	4	4	29259;35008;35170;35343	2	1
IASFSQNCDIYPGKDFVQPPTK	C8(160.0307)	22	1	2511.2102	R	sp|P01042|KNG1_HUMAN Kininogen-1 OS=Homo sapiens OX=9606 GN=KNG1 PE=1 SV=2	I	sp|P01042|KNG1_HUMAN Kininogen-1 OS=Homo sapiens OX=9606 GN=KNG1 PE=1 SV=2	TARGET	3	1	26410	2	1
KVNCTTQPCPTAKAPTCGLCEVAR	N3(115.0269);C4(160.0307);C9(160.0307);C17(160.0307);C20(160.0307)	24	2	2719.2549	R	sp|P04275|VWF_HUMAN von Willebrand factor OS=Homo sapiens OX=9606 GN=VWF PE=1 SV=4	L	sp|P04275|VWF_HUMAN von Willebrand factor OS=Homo sapiens OX=9606 GN=VWF PE=1 SV=4	TARGET	3;4	4	18498;18514;18691;17561	2	1
HTSVQTTSSGSGPFTDVR		18	0	1862.8757	R	sp|P02751|FINC_HUMAN Fibronectin OS=Homo sapiens OX=9606 GN=FN1 PE=1 SV=4	A	sp|P02751|FINC_HUMAN Fibronectin OS=Homo sapiens OX=9606 GN=FN1 PE=1 SV=4	TARGET	2;3	5	18956;17311;17486;17646;17660	2	1
TFVLSALQPSPTHSSSNTQR		20	0	2157.0813	R	sp|P19827|ITIH1_HUMAN Inter-alpha-trypsin inhibitor heavy chain H1 OS=Homo sapiens OX=9606 GN=ITIH1 PE=1 SV=3	L	sp|P19827|ITIH1_HUMAN Inter-alpha-trypsin inhibitor heavy chain H1 OS=Homo sapiens OX=9606 GN=ITIH1 PE=1 SV=3	TARGET	2;3;4	24	30231;27913;27945;27977;28073;28137;28140;28234;28728;28824;28840;29016;28731;28843;28905;28921;29017;29081;29097;29257;28719;25248;25417;24644	2	1
APSHQQATTAGSPLR		15	0	1520.7694	K	sp|P12259|FA5_HUMAN Coagulation factor V OS=Homo sapiens OX=9606 GN=F5 PE=1 SV=4	H	sp|P12259|FA5_HUMAN Coagulation factor V OS=Homo sapiens OX=9606 GN=F5 PE=1 SV=4	TARGET	3	2	13201;10140	2	1
ADLAKYICENQDSISSK	C8(160.0307)	17	1	1940.9149	R	sp|P02768|ALBU_HUMAN Serum albumin OS=Homo sapiens OX=9606 GN=ALB PE=1 SV=2	L	sp|P02768|ALBU_HUMAN Serum albumin OS=Homo sapiens OX=9606 GN=ALB PE=1 SV=2	TARGET	2	1	13824	2	1
GVAHNNLMAMAQETGDNLYWGSVTGSQSNAVSPTPAPR	N5(115.0269);M8(147.0354)	38	0	3944.8057	R	sp|P0C0L5|CO4B_HUMAN Complement C4-B OS=Homo sapiens OX=9606 GN=C4B PE=1 SV=2	N	sp|P0C0L5|CO4B_HUMAN Complement C4-B OS=Homo sapiens OX=9606 GN=C4B PE=1 SV=2	TARGET	4	1	42719	2	1
GVAHNNLMAMAQETGDNLYWGSVTGSQSNAVSPTPAPR	N5(115.0269);M8(147.0354);M10(147.0354);Q12(129.0426);N29(115.0269)	38	0	3962.7686	R	sp|P0C0L5|CO4B_HUMAN Complement C4-B OS=Homo sapiens OX=9606 GN=C4B PE=1 SV=2	N	sp|P0C0L5|CO4B_HUMAN Complement C4-B OS=Homo sapiens OX=9606 GN=C4B PE=1 SV=2	TARGET	4	1	42403	2	1

## Sheet: Protein
Group ID	Group State	Accession	Hit Type	# Match Spectrum	# Match Sequence	PIA:protein score
PAG_000000	MEMBER	sp|P01042|KNG1_HUMAN Kininogen-1 OS=Homo sapiens OX=9606 GN=KNG1 PE=1 SV=2	TARGET	1	1	30.45
PAG_000001	MEMBER	sp|P02765|FETUA_HUMAN Alpha-2-HS-glycoprotein OS=Homo sapiens OX=9606 GN=AHSG PE=1 SV=1	TARGET	1764	1	49.75
PAG_000002	MEMBER	sp|Q92954|PRG4_HUMAN Proteoglycan 4 OS=Homo sapiens OX=9606 GN=PRG4 PE=1 SV=3	TARGET	1	1	35.39
PAG_000003	MEMBER	sp|P02768|ALBU_HUMAN Serum albumin OS=Homo sapiens OX=9606 GN=ALB PE=1 SV=2	TARGET	6	3	89.53
PAG_000004	MEMBER	sp|P01024|CO3_HUMAN Complement C3 OS=Homo sapiens OX=9606 GN=C3 PE=1 SV=2	TARGET	1	1	31.10
PAG_000005	MEMBER	sp|Q96PD5|PGRP2_HUMAN N-acetylmuramoyl-L-alanine amidase OS=Homo sapiens OX=9606 GN=PGLYRP2 PE=1 SV=1	TARGET	9	1	41.28
PAG_000006	MEMBER	sp|P02649|APOE_HUMAN Apolipoprotein E OS=Homo sapiens OX=9606 GN=APOE PE=1 SV=1	TARGET	36	1	48.09
PAG_000007	MEMBER	sp|P02656|APOC3_HUMAN Apolipoprotein C-III OS=Homo sapiens OX=9606 GN=APOC3 PE=1 SV=1	TARGET	4	1	25.48
PAG_000008	MEMBER	sp|P00450|CERU_HUMAN Ceruloplasmin OS=Homo sapiens OX=9606 GN=CP PE=1 SV=1	TARGET	4	1	32.01
PAG_000009	MEMBER	sp|P19827|ITIH1_HUMAN Inter-alpha-trypsin inhibitor heavy chain H1 OS=Homo sapiens OX=9606 GN=ITIH1 PE=1 SV=3	TARGET	580	1	39.94
PAG_000010	MEMBER	sp|Q13790|APOF_HUMAN Apolipoprotein F OS=Homo sapiens OX=9606 GN=APOF PE=1 SV=2	TARGET	1	1	33.52
PAG_000011	MEMBER	sp|P04275|VWF_HUMAN von Willebrand factor OS=Homo sapiens OX=9606 GN=VWF PE=1 SV=4	TARGET	26	2	66.60
PAG_000012	MEMBER	sp|P04004|VTNC_HUMAN Vitronectin OS=Homo sapiens OX=9606 GN=VTN PE=1 SV=1	TARGET	6	2	83.81
PAG_000013	MEMBER	sp|P0C0L5|CO4B_HUMAN Complement C4-B OS=Homo sapiens OX=9606 GN=C4B PE=1 SV=2	TARGET	58	1	58.94
PAG_000014	MEMBER	sp|P04196|HRG_HUMAN Histidine-rich glycoprotein OS=Homo sapiens OX=9606 GN=HRG PE=1 SV=1	TARGET	5	2	55.19
PAG_000015	MEMBER	sp|P02751|FINC_HUMAN Fibronectin OS=Homo sapiens OX=9606 GN=FN1 PE=1 SV=4	TARGET	25	1	47.54
PAG_000016	MEMBER	sp|Q9NZP8|C1RL_HUMAN Complement C1r subcomponent-like protein OS=Homo sapiens OX=9606 GN=C1RL PE=1 SV=2	TARGET	5	2	93.49
PAG_000017	MEMBER	sp|P01876|IGHA1_HUMAN Immunoglobulin heavy constant alpha 1 OS=Homo sapiens OX=9606 GN=IGHA1 PE=1 SV=2	TARGET	3601	1	51.52
PAG_000018	MEMBER	sp|P12259|FA5_HUMAN Coagulation factor V OS=Homo sapiens OX=9606 GN=F5 PE=1 SV=4	TARGET	4	1	36.66
PAG_000019	MEMBER	sp|Q9UGM5|FETUB_HUMAN Fetuin-B OS=Homo sapiens OX=9606 GN=FETUB PE=1 SV=2	TARGET	1	1	31.65
PAG_000020	MEMBER	sp|P00747|PLMN_HUMAN Plasminogen OS=Homo sapiens OX=9606 GN=PLG PE=1 SV=2	TARGET	21	2	62.26
